1 **Development of a model estimating root length density from root impacts on a soil**  
2 **profile in pearl millet (*Pennisetum glaucum* (L.) R. Br). Application to measure root**  
3 **system response to water stress in field conditions**

4 Faye A.<sup>1,2</sup>, Sine B.<sup>3</sup>, Chopart J.L.<sup>4</sup>, Grondin A.<sup>1,2,3,5</sup>, Lucas M.<sup>1,2,5</sup>, Diedhiou A.<sup>1,2,6</sup>, Gantet P.<sup>5</sup>,  
5 Cournac L.<sup>7,8</sup>, Min, D.<sup>9</sup>, Audebert A.<sup>1,3,10</sup>, Kane A.<sup>1,2,6</sup>, Laplaze L.<sup>1,2,5</sup>

6 <sup>1</sup> Laboratoire mixte international Adaptation des Plantes et microorganismes associés aux  
7 Stress Environnementaux (LAPSE), Dakar, Senegal

8 <sup>2</sup> Laboratoire Commun de Microbiologie IRD/ISRA/ UCAD, Dakar, Senegal

9 <sup>3</sup> Centre d'Etude Régional pour l'Amélioration de l'Adaptation à la Sécheresse (CERAAS),  
10 Institut Sénégalais des Recherches Agricoles (ISRA), Thiès, Senegal

11 <sup>4</sup> Agerconsult, Montpellier, France

12 <sup>5</sup> UMR DIADE, Université de Montpellier, Institut de Recherche pour le Développement  
13 (IRD), Montpellier, France

14 <sup>6</sup> Département de Biologie Végétale, Université Cheikh Anta Diop (UCAD), Dakar, Senegal

15 <sup>7</sup> UMR Eco&Sols, Institut de Recherche pour le Développement, Centre de coopération  
16 Internationale en Recherche Agronomique pour le Développement (CIRAD), Institut National  
17 de la Recherche Agronomique (INRA), Montpellier Supagro, Université de Montpellier,  
18 Montpellier, France

19 <sup>8</sup> Laboratoire mixte international Intensification Ecologique des Sols Cultivés en Afrique de  
20 l'Ouest (IESOL), Dakar, Senegal

21 <sup>9</sup> Department of Agronomy, Kansas State University, Manhattan, Kansas, USA

22 <sup>10</sup> AGAP, Centre de coopération Internationale en Recherche Agronomique pour le  
23 Développement (CIRAD), Institut National de la Recherche Agronomique (INRA),  
24 Montpellier SupAgro, Université de Montpellier, Montpellier, France

25 \* **Correspondence:** Email: laurent.laplaze@ird.fr

## 26 **Abstract**

27 Pearl millet, unlike other cereals, is able to withstand dry and hot conditions and plays an  
28 important role for food security in arid and semi-arid areas of Africa and India. However, low  
29 soil fertility and drought constrain pearl millet yield. One of the main targets to address these  
30 constraints through agricultural practices or breeding is root system architecture. In this study,  
31 in order to easily phenotype the root system in field conditions, we developed a model to  
32 predict root length density (RLD) of pearl millet plants from root intersection densities (RID)  
33 counted on a trench profile in field conditions. We identified root orientation as an important  
34 parameter to improve the relationship between RID and RLD. Root orientation was notably  
35 found to differ between thick roots (more anisotropic with depth) and fine roots (isotropic at  
36 all depths). We used our model to study pearl millet root system response to drought and  
37 showed that pearl millet reorients its root growth toward deeper soil layers that retain more  
38 water in these conditions. Overall, this model opens ways for the characterization of the  
39 impact of environmental factors and management practices on pearl millet root system  
40 development.

41

## 42 **Introduction**

43 Pearl millet (*Pennisetum glaucum* (L.) R. Br., syn. *Cenchrus americanus* (L.) Morrone) is a  
44 cereal crop domesticated in the Western part of Sahel about 5,000 years ago [1]. It is well  
45 adapted to dry tropical climate and low-fertility soils and therefore plays an important role for  
46 food security in arid and semi-arid regions of sub-Saharan Africa and India. In these areas,  
47 pearl millet is one of the most important sources of nutritious food [2, 3] and is the staple crop  
48 for nearly 100 million people [4, 1]. Its grain is rich in protein, essential micronutrients and  
49 calories. It is also gluten-free and has hypoallergenic properties [4]. In a context of climate  
50 change leading to unpredictable weather patterns and rising temperatures in West Africa [5,  
51 6], pearl millet could play an even more important role for food security because it can  
52 withstand hot and dry conditions that would lead to the failure of other locally grown cereal  
53 crops such as maize or sorghum. However, pearl millet lags far behind other cereals in terms  
54 of breeding and its yield is low. The recent sequencing of a reference genome and about 1,  
55 000 accessions [4] open the way for a new era of genomic-based breeding in pearl millet.  
56 However, this will depend on the availability of phenotyping methods to characterize and  
57 exploit the available genetic diversity and identify interesting target traits.

58 Drought and low soil fertility are among the most important factors limiting pearl millet  
59 yield. The root system is responsible for water and nutrient uptake, and root system  
60 architecture is therefore a potential target in pearl millet breeding program to address these  
61 constraints. It is also an important trait to consider when analyzing the impact of agricultural  
62 practices. However, despite tremendous progress in the genetic characterization of root  
63 development, root system architecture phenotyping remains challenging particularly in  
64 agronomically-relevant field conditions. The root length density (total length of roots per unit  
65 of soil volume; RLD) is a key factor to estimate the soil volume explored by a root system

66 and consequently the amount of water and nutrients available to the plant [7-12]. Therefore,  
67 RLD could be used to screen drought-resistant varieties.

68 The aim of this study was to develop a technique to map RLD in pearl millet plants from  
69 simple measurements in field conditions. For this we analyzed the relationship between RLD  
70 and root intersection densities (number of roots intersecting a vertical plane per unit of  
71 surface; RID) counted on trench profiles in field conditions. From this, we computed and  
72 experimentally validated a simple mathematical model linking RLD to RID. We then used  
73 this model to study the effect of drought stress on pearl millet root system architecture in two  
74 pearl millet varieties.

75

## 76 **Materials and methods**

### 77 **Plant material**

78 Four millet varieties were used for model calibration (Exp. 1): Souna3, Gawane, Thialack2  
79 and SL87 (Table 1). Six varieties were tested for model validation (Exp. 2): Souna3 (common  
80 between Exp. 1 and Exp. 2), IBV8004, GB8735, ISMI9507, SL423, and SL28 (Table 1). The  
81 impact of water stress on pearl millet root system development was tested in a third  
82 experiment (Exp. 3) on SL28 (dual-purpose variety) and LCICMB1 (inbred line; [13]).

83 **Table 1: Pearl millet varieties used in this study**

| Varieties | Origin  | Cycle (days) | Genetic nature | Maximum height (cm) |
|-----------|---------|--------------|----------------|---------------------|
| Souna3    | Senegal | 85-95        | Synthetic      | 240                 |
| Gawane    | Senegal | 85           | Composite      | 250                 |
| Thialack2 | Senegal | 95           | Composite      | 250                 |

|          |         |       |                     |     |
|----------|---------|-------|---------------------|-----|
| SL87     | Senegal | 56    | Landrace            | 242 |
| SL423    | Senegal | 54    | Landrace            | 253 |
| SL28     | Senegal | 56    | Landrace            | 267 |
| IBV8004  | Senegal | 75-85 | Synthetic           | 220 |
| GB8735   | Niger   | 70    | Improved population | 150 |
| ISMI9507 | Senegal | 58    | Synthetic           | 220 |
| LCICMB1  | Nigeria | 80    | Inbred line         | 142 |

84

85

## 86 **Site characteristic and experimentations**

87 Field trials were performed at the Centre National de Recherche Agronomique station  
88 (CNRA) of the Institut Sénégalais des Recherches Agricoles (ISRA) in Bambey, Senegal  
89 (14.42°N, 16.28°W, altitude 17 m) in collaboration with and with the permission of the ISRA.  
90 Trials did not involve endangered or protected species. Exp. 1 was performed for model  
91 calibration during the rainy season 2016, Exp. 2 was performed in the dry season 2017 for  
92 model validation and Exp. 3 was performed in the dry season 2018 for response of pearl  
93 millet to a water stress. Exp. 2 and 3 were performed in the dry season in order to fully control  
94 the irrigation regime. Soil in the field trials was sandy and had the typical characteristics of  
95 the West Africa Sahelian soils in which pearl millet is grown. Tillage and chemical  
96 fertilization were applied as recommended for pearl millet [14]. Weeding was performed  
97 before planting.

98 Exp. 1 and Exp. 2 were laid out in a randomized complete block design with four plots per  
99 variety, each with five rows of 4 m long with a spacing of 0.8 m between plants and rows. In  
100 Exp. 1, water was provided by rainfall and additional irrigation was provided when needed  
101 (S1 Fig). Water stress was quantified using the PROBE water balance model [15]. The water  
102 balance simulations showed a decrease in the daily actual evapotranspiration to maximum  
103 evapotranspiration (AET/MET) ratio at the end of the cycle (S1 Fig). In Exp. 2, field was  
104 irrigated twice a week until 70 days after planting (DAP) and rainfall occurred at the end of  
105 the cycle (S1 Fig). The AET/MET ratio decreased only during the last days of cropping cycle  
106 (S1 Fig).

107 Exp. 3 was laid out in a randomized complete blocks design with split-plot into four  
108 blocks, the whole plots were for the water regime and the split-plots were for the varieties  
109 treatments. Plots consisted in four rows of 4 m long with 0.80 m between plants and rows.  
110 Thinning was done on eight days after emergence, at the rate of 2 plants per planting hole. In  
111 the well-watered plots (WW), irrigation was performed twice per week with 30 mm water per  
112 irrigation. In the drought stress plots (DS), a water stress was applied by withholding  
113 irrigation from 40 DAP for 32 days (S2 Fig) leading to a strong decrease in the AET/MET  
114 ratio (S2 Fig). At 72 DAP irrigation was resumed until the end of the growth cycle in addition  
115 with the first rain in June (S2 Fig). Field dry-down was monitored by measuring volumetric  
116 soil moisture to evaluate the fraction of transpirable soil water (FTSW) using Diviner probes  
117 (Sentek Pty Ltd) as previously described [14].

118

## 119 **Roots sampling for model development**

120 We adapted a method previously described to estimate the RLD from intersections between  
121 roots and the face of a soil trench profile (root intersection density or RID; [10-12, 16 and  
122 17]). Trench profiles were dug perpendicularly to the sowing rows and at two distances (30

123 then 10 cm) from the plant stalk base (Fig 1A). Three-sided incomplete steel cubes with  
124 sharpened edges facilitating penetration into the soil were used to sample soil cubes (Fig  
125 1BC). The sampling device was pressed into open soil profile (trench profile) until its rear  
126 plane was aligned with the soil profile (Fig 1D) and then cut out of the soil to obtain a cube of  
127 soil (Fig 1E). A second sample was taken at the same depth and distance from the plant but  
128 with the open sides oriented in the opposite direction, in order to have open soil planes for six  
129 sides of the cube. Sampling was made at six depth levels ranging from 0.1 to 1.1 m and at two  
130 different dates (60 and 80 days after sowing, DAS). For each soil cube, the number of impacts  
131 (number of roots intersecting a plane, NI) on each side (transversal, longitudinal and  
132 horizontal; Fig 1B) was counted in the field immediately after sampling (Fig 1F; [10-12]).  
133 Thereafter, roots were washed out of the sampled soil cubes using a sieving conventional  
134 technique. Root lengths were measured for thick ( $d > 1$  mm) and fine roots ( $d < 1$  mm) after  
135 scanning and analysis with WinRhizo (v 4, Regent Instruments, Inc, Quebec, Canada).  
136 Measurements were repeated four times per variety (384 cubes in total) and repeated  
137 measurements were averaged (i.e., same variety, same seeding rate, same date and same  
138 position).

139 The same protocol was used in the validation test, except that measurements were  
140 performed at four sampling dates (21, 40, 60 and 80 DAP) at eight soil depths ranging from  
141 0.1 to 1.6 m. Measurements were repeated three times per variety (725 cubes in total). Soil  
142 samples containing less than three roots on one side of the cube were not considered.

143

## 144 **Model construction and test**

145 A model was developed to establish a relationship between root impacts (root intersection  
146 densities, RID) counted on the two vertical planes of the cubes (longitudinal,  $l$ , and transversal  
147 plane,  $t$ ) and the measured root length density ( $RLD_m$ ) contained in the soil samples collected.

148 RLD of fine and thick roots were calculated ( $RLD_c$ ) on the basis of RID measured in a  
149 vertical soil plane using a direct empirical relationship first, and then considering the root  
150 distribution (anisotropy, root preferential orientation (P) as proposed by Lang and Melhuish  
151 [18]). A vertical index ( $P_v$ ) was calculated for the two vertical planes ( $l$  and  $t$ ) using root  
152 counted on three faces of a soil cube ( $l$ ,  $t$  and horizontal,  $h$ ) as follow:

$$153 \quad P_v = \frac{2 * RID_h}{RID_t + RID_l} \quad (1)$$

154 If  $P_v > 1$  or  $< 1$ , the roots have a parallel or perpendicular preferential orientation with  
155 respect to the reference plane  $v$ . Depending on whether the  $P_v$  is =, > or < to 1, three RLD  
156 equations can be considered to calculate  $RLD_c$  from  $RID_v$  of all  $P_v$  values [10, 19, and 20].  
157 They can be combined in a general relationship using a synthetic root orientation coefficient  
158 (CO) dependent on  $P_v$  index values as described in Equation (3):

$$159 \quad \text{For } P_v > 1: RLD_c = RID_v (16 P_v^2 + 8 P_v + 6) / (10 P_v + 5) \quad (\text{Eq2a})$$

$$160 \quad \text{For } P_v < 1 : RLD_c = RID_v (3 P_v^2 + 2 P_v + 1) / (2P_v + 1) \quad (\text{Eq2b})$$

$$161 \quad \text{For } P_v = 1 \text{ (isotropic distribution): } RLD_c = 2RID_v \quad (\text{Eq2c})$$

$$162 \quad RLD_c = RID_v CO_v \quad (\text{Eq 3})$$

## 163 **Mapping of root intersections density (RID) on a trench-profile**

164 In order to test the impact of water stress on pearl millet root development, a trench-profile  
165 method was used [20, and 21]. Soil-root intersections on a trench profile were counted using a  
166 5 cm mesh grid applied to the soil profile (Fig 1G). Root intersections were counted at two  
167 distances (30 then 10 cm) from the base of the stalks and until no more roots could be found  
168 on the vertical dimension of the trench-profile. Root counting was performed at two dates of



169 the cropping cycle: at the beginning of a stress (44 DAP) and at the end of stress (72 DAP).  
170 At each date, four soil profiles were measured per variety.

171

## 172 **Statistical analyses**

173 Excel 2013 (Microsoft Corporation) was used for data cleansing and synthesis, to calculate  
174 anisotropy and preferential orientation indexes and to develop and test the obtained models.  
175 SPSS and R softwares (IBM Corp. Released 2016. IBM SPSS Statistics for Windows,  
176 Version 24.0. Armonk, NY: IBM Corp and R Development Core Team (2008). URL  
177 <http://www.R-project.org>.) were used to study the relationships linking the direction indexes  
178 and the experimental factors through an analysis of variance and a Student's independence test  
179 at the 5% threshold. For model development study, the quality of the relationships between  
180 the RLD values measured in soil cubes ( $RLD_m$ ) and those modelled ( $RLD_c$ ) were evaluated  
181 taking into account slope, intercept and regression ( $R^2$ ). Nash's Efficiency Ratio (NE; [22]),  
182 root mean square error (RMSE; [23]) and mean bias were used to compare measured ( $RLD_m$ )  
183 and calculated ( $RLD_c$ ) deviations.

184

## 185 **Results**

### 186 **Development of a model to extrapolate RLD from RID in field** 187 **conditions**

188 Four pearl millet varieties were selected to measure root intersections density (RID) and root  
189 length densities ( $RLD_m$ ) and try to create a model estimating root length densities in field  
190 conditions. We first analyzed the diversity of these four pearl millet varieties for root and  
191 shoot characters. There were significant differences in root length densities ( $RLD_m$ ) and root

192 biomass densities (Fig 2A,B). Some varieties had deeper root systems than others. By contrast  
193 no significant differences were observed between varieties for shoot traits such as biomass  
194 (Fig 2C). Hence, these four varieties had contrasted root systems and were deemed suitable  
195 for model development.

196 We then analyzed the relationships between measured RLD and root intersection densities  
197 (i.e. the number of root impacts on a soil surface per surface unit; RID) on the 3 sides of a soil  
198 cube. Cubic soil samples were taken at 30 then 10 cm from the plant at different depth at 60  
199 and 80 DAP. The number of root intersections (NI) was counted on 3 sides (vertical,  
200 transversal and horizontal) of the cube and then roots were washed out of the sampled soil  
201 cubes using a sieving conventional technique and root length was measured to compute a  
202 measure RLD ( $RLD_m$ ). Two classes of roots (thick  $>1$  mm and fine  $<1$  mm) were considered.  
203 The simple linear regression between the number of impacts (NI) counted for all roots in a  
204 vertical plane and  $RLD_m$  for all roots showed unsatisfactory fit ( $RLD = 1.83 NI$ ;  $R^2 = 0.575$ ,  
205  $n = 70$ ; Fig 3) indicating that more parameters needed to be included.

206 Previous studies on several crops revealed different growth orientations for roots  
207 depending on soil depth [10, 11]. We therefore analyzed the impact of soil depth (seven soil  
208 depths between 10 and 130 cm), plant varieties and distance to the plant stalk base on root  
209 growth orientation. The root preferential orientation (Pv) was estimated from three-sided  
210 counts of a cube and used to calculate a root orientation coefficient (COv). We observed that  
211 the main root growth direction estimated by the Pv coefficient were not significantly different  
212 between varieties, measuring dates (60 JAS and 80 JAS) or sampling distances (10 or 30 cm)  
213 to the plant (S1 Table). The Pv index only depended on depth. As a consequence, the results  
214 from all varieties, measurement dates and sampling distances were pooled and we only  
215 analyzed the relationship between depth and root growth orientation. Considering all roots,  
216 we found a linear relationship between the root orientation index on a vertical plane (P) and

217 depth ( $Z$  in meters; Fig 4A;  $P_v = 0.3408 Z + 0.905$ ;  $R^2 = 0.843$ ,  $n = 70$ ). Similarly, the root  
218 orientation coefficient ( $CO_v$ ) was closely dependent on root depth (Fig 4B;  $B$ ;  $CO_v = 0.471 Z$   
219  $+ 1.869$ ;  $R^2 = 0.839$ ,  $n = 70$ ).  $CO_v$  values ranged from 1.92 at 0.10 m depth to 2.44 at 1.4 m  
220 depth. It was close to 2 close to the surface (0.10 m), indicating that roots had no preferential  
221 growth direction in the topsoil layers and that they gradually grew more in a vertical direction  
222 with depth.

223 The root direction coefficient of fine roots ( $CO_{vf}$ ) had a low dependence on soil depth (Fig  
224 4A;  $CO_{vf} = 0.089 Z + 2.02$ ;  $R^2 = 0.118$ ,  $n = 70$ ).  $P_f$  was close to 1 indicating a weak preferential  
225 direction of the fine roots. Similarly,  $CO_{vf}$  had a low dependence on soil depth from 2.02  
226 close to the surface to 2.18 at 1.1 meters depth (Fig 4B). For fine roots, we thus retained a  
227 fixed constant value of 2.08 corresponding to the average value of  $CO_{vf}$ .

228 For thick roots, root direction ( $P_{vt}$ ) and root orientation coefficients ( $CO_{vt}$ ) were strongly  
229 dependent on soil depth (Fig 4;  $CO_{vt} = 1.937 Z + 1.42$ ;  $R^2 = 0.839$ ,  $n = 70$ ).  $CO_{vt}$  varied from  
230 1.6 at 0.10 m depth to almost 4 at 1.3 m depth. This indicates that thick roots tend to grow  
231 horizontally close to the surface and that their growth becomes more and more vertical with  
232 soil depth.

233 Altogether, our results indicate that in field conditions pearl millet root orientation depends  
234 on soil depth. Thick roots orientation is more sensitive to this than fine roots. We therefore  
235 included this information to build 4 models to estimate RLD from RID on the vertical plane  
236 taking soil depth ( $Z$ : depth in meter) into account:

237 - an empirical model for all roots:  $RLD_a = 1.83 * RID_a$

238 - a geometrical model for all roots:  $RLD_a = (0.471 * Z + 1.87) * RID_a$

239 - a geometrical model for fine roots:  $RLD_f = 2.08 * RID_f$

240 - a geometrical model for thick roots:  $RLDt = (1.937*Z+1.42)* RIDt$

241

## 242 **Models validation**

243 Models developed from the data obtained on four varieties during the rainy season 2016 were  
 244 tested during the dry season 2017 in another field location and with different varieties to  
 245 maximize the differences between the calibration and validation tests. We used six varieties  
 246 including five varieties different from those used for model calibration. The quality of the  
 247 relationships obtained was studied taking into account slope, intercept and regression ( $R^2$ ),  
 248 Nash's Efficiency Ratio (NE; [22]), root mean square error (RMSE; [23] and mean bias (MB).  
 249 The results of our statistical tests on the different models are summarized in Table2.

250

251 **Table 2. Models validation analyses.**

|             |            |          | Linear regression |       |           |       | Tests    |        |      |
|-------------|------------|----------|-------------------|-------|-----------|-------|----------|--------|------|
| Model       | Root types | Variety  | n                 | Slope | Intercept | $R^2$ | RMSE (%) | MB (%) | NE   |
| Empirical   | All        | All var  | 166               | 1.11  | -1915     | 0.82  | 87       | 24     | 0.58 |
| Geometrical | All        | SL423    | 28                | 1.08  | -1259     | 0.83  | 31       | 12     | 0.77 |
|             |            | Souna3   | 28                | 1.06  | -1047     | 0.84  | 26       | 11.    | 0.79 |
|             |            | SL28     | 29                | 1.08  | -1253     | 0.87  | 32       | 10     | 0.83 |
|             |            | IBV 8004 | 28                | 1.10  | -1619     | 0.76  | 32       | 14     | 0.70 |
|             |            | GB 8735  | 25                | 1.41  | -3345     | 0.88  | 42       | 11     | 0.78 |
|             |            | ISM 9507 | 28                | 1.07  | -1064     | 0.73  | 36       | 8      | 0.71 |
|             |            | All var  | 166               | 1.11  | -1491     | 0.81  | 34       | 11     | 0.77 |

|             |       |          |     |      |       |      |    |      |      |
|-------------|-------|----------|-----|------|-------|------|----|------|------|
| Geometrical | Fine  | SL423    | 28  | 1.12 | -1229 | 0.80 | 35 | 10   | 0.76 |
|             |       | Souna3   | 28  | 1.11 | -1228 | 0.84 | 28 | 11   | 0.80 |
|             |       | SL28     | 29  | 1.14 | -1401 | 0.83 | 37 | 9    | 0.81 |
|             |       | IBV 8004 | 28  | 1.16 | -1754 | 0.78 | 42 | 13   | 0.73 |
|             |       | GB 8735  | 25  | 1.52 | -3464 | 0.89 | 39 | 8    | 0.78 |
|             |       | ISM 9507 | 28  | 1.13 | -1282 | 0.72 | 40 | 7    | 0.70 |
|             |       | All var. | 166 | 1.18 | -1625 | 0.80 | 37 | 10   | 0.76 |
| Geometrical | Thick | SL423    | 23  | 1.38 | -223  | 0.64 | 38 | -0.1 | 0.60 |
|             |       | Souna3   | 26  | 1.59 | -269  | 0.75 | 37 | -13  | 0.61 |
|             |       | SL28     | 26  | 1.21 | -75   | 0.77 | 34 | -9   | 0.73 |
|             |       | IBV 8004 | 21  | 0.77 | 169   | 0.33 | 36 | -7   | 0.28 |
|             |       | GB 8735  | 18  | 0.97 | 60    | 0.32 | 44 | -7   | 0.30 |
|             |       | ISM 9507 | 24  | 0.94 | 165   | 0.51 | 44 | -22  | 0.41 |
|             |       | All var. | 138 | 1.15 | -30   | 0.59 | 39 | -10  | 0.55 |

252 Characteristics of linear regressions between measured and calculated RLD values. Statistical tests on deviations  
 253 between measured and calculated RLD values (RMSE: root mean square error), mean bias (MB) and Nash  
 254 efficiency (NE).

255 Considering all roots (fine and thick), statistical tests showed that the measured and  
 256 calculated RLD values were significantly closer with the geometrical model than with the  
 257 empirical model (Table 2). The MB induced by both models was an underestimation of RLDs  
 258 for low root intersection densities, generally at depth (Tables 2 & 3, Fig 5A,B).

259 **Table 3. Comparison of the model's and calculated RLD values of all roots samples**  
 260 **using the empirical or geometric models for extreme RLD values.**

| Model | RLDm m.m <sup>-3</sup> | RLDc m.m <sup>-3</sup> |
|-------|------------------------|------------------------|
|-------|------------------------|------------------------|

|           |       |       |
|-----------|-------|-------|
| Geometric | 2000  | 729   |
|           | 20000 | 20709 |
| Empirical | 2000  | 305   |
|           | 20000 | 20285 |

261

262 The results obtained using models estimating only the fine roots (diameter < 1mm), were  
263 close to those obtained using model estimating all roots together. There were good  
264 relationships between measured and calculated values of fine roots for each variety except GB  
265 8735 (Fig 5C, Table2).

266 RLD for thick roots (diameter > 1 mm) ranged from 0 to 2000 m.m<sup>-3</sup>, about ten times  
267 lower (Fig 5D) than those for fine roots (Fig 5C). The model construction showed that when  
268 the impact density is very low, the relationship between the measured values and those  
269 calculated by the thick roots model becomes irregular. It was therefore decided to limit the  
270 validation test of the model to a minimum of 70 soil-root intersections per m<sup>2</sup> (corresponding  
271 to at least 3-4 roots on at least one cube face). This value is low, less than one root  
272 intersection per dm<sup>2</sup> (1 per 15 cm square). The validity domain of the "thick root" model will  
273 therefore be limited to root intersection counts greater than 70 impacts per m<sup>2</sup>. Despite the  
274 removal of the very low RID values, the model does not satisfactorily estimate the RLD when  
275 the measured RLD values are low, below 500 m.m<sup>-3</sup>. For these low RLD values, the  
276 calculated values were highly fluctuating, but there is no significant bias since the average  
277 values per depth of RLD<sub>m</sub> and RLD<sub>c</sub> were close (Fig 5D). For higher values of RID and RLD,  
278 the model estimated well the RLD averages, although it was still not very accurate when  
279 considering sample-by-sample relationships. Among the six tested varieties, two (IBV8004  
280 and GB8735) lead to poorer relationships between the measured RLD values and those  
281 estimated by the model (Table 2). These two varieties presented the highest number of

282 samples with RID below 70/m<sup>2</sup> that were excluded from the analysis and resulted in reduced  
283 the number of samples in the dataset. Thus, the percentage of samples eliminated was 25% for  
284 IBV8004 and 28% for GB8735 while the percentage of samples eliminated for the other 4  
285 varieties was 12% on average.

286 Altogether, our experiments validated the following models for RLD estimation from RID:

287 - for all roots (a):  $RLDa = (0.471 * Z + 1.87) * RIDa$

288 - for fine roots (d < 1 mm):  $RLDf = 2.08 * RIDf$

289 - for thick roots (d > 1 mm):  $RLDt = (1.937 * Z + 1.42) * RIDt$

290 However, the latter was only usable for RLDs > 500 m.m<sup>-3</sup> and its use is therefore limited.

## 291 **Response of pearl millet root system to water stress**

292 We next used our model that takes into account all roots to study the effect of water stress  
293 on root architecture in two different pearl millet germplasms, the dual-purpose SL28 variety  
294 and the inbred line LCICMB1 (Exp. 3). These two germplasms were grown under irrigated  
295 conditions for 40 DAP. Irrigation was then stopped in the drought stress treatment for 31 days  
296 while it was maintained in the well-watered treatment. Irrigation was then resumed till the end  
297 of the cycle.

298 Soil water content was followed using Diviner probes and used to compute the fraction of  
299 transpirable soil water (FTSW) as previously described [14]. FTSW values below 40%  
300 indicate here water-limiting conditions [24]. In the well-watered treatment, FTSW remained  
301 above 40% along the soil profile from 30 to 90 DAP (S3 Fig). In the drought stress treatment,  
302 water withholding at 31 DAP led to soil drying and induced a reduction in FTSW that fall  
303 under 40% between 50 DAP and 70 DAP in the 0-30 cm and 30-60 cm soil layers,  
304 respectively (S3 Fig). FTSW was also reduced in the 60-90 cm soil layer reaching 40% at 78

305 DAP, but remained above 40% below 90 cm throughout the drought stress treatment (S3 Fig).  
306 These results are consistent with the ETR / ETM crop ratio values calculated by water balance  
307 modeling that estimate ETR / ETM values below 0.3 between 60 and 75 JAP (S2 Fig).  
308 Altogether, these results indicate efficient field dry-down and imposition of water limited  
309 conditions from topsoil to a depth of around 90 cm in the drought stress treatment.

310 Agromorphological characteristics were then measured at the end of the cycle (99 DAP).  
311 SL28 is a dual-purpose pearl millet variety selected for both fodder and grain production.  
312 Accordingly, it shows a very large biomass and grain production compared to the inbred line  
313 LCICMB1 in well-watered conditions (Fig 6A,B). Moreover, these two lines showed  
314 contrasted responses to drought stress conditions. SL28 showed a very strong and significant  
315 reduction in both biomass and grain production in response to water stress while these traits  
316 were not significantly affected in LCICMB1 (Fig 6A,B).

317 We used the geometrical model for all roots to estimate RLD from RID along soil profiles.  
318 Measurements were performed in both well-watered and drought stress conditions for both  
319 lines at 43 and 71 DAP, i.e. at the beginning and at the end of the water stress period. Three  
320 days after stress application (43 DAP), the RLD profiles were not significantly different for  
321 well-watered and drought stress conditions for both lines (Fig 7A,B) indicating that the  
322 change in water availability had not significantly impacted root architecture at this stage.  
323 However, 31 days after stress application (71 DAP), we observed strong and significant  
324 changes in RLD profiles between well-watered and drought stressed plants (Fig 7C,D). For  
325 both SL28 and LCICMB1, drought stress led to a significant reduction of RLD in the 0-20 cm  
326 soil horizon and to a significant increase in RLD in deep soil layers (> 60 cm; Fig 7C,D). We  
327 used the Racine 2.1 application [25] to generate 2D maps of RLD from our data. These maps  
328 clearly showed a drastic change in root development occurring both in SL28 and LCICMB1  
329 with a reduction of RLD in topsoil layers and a colonization of deeper soil layer under



330 drought as compared to well-watered conditions (Fig 8A,B). Hence, our data demonstrate that  
331 upon drought conditions, both pearl millet lines reduced root growth in the dry topsoil layers  
332 and increased their root growth in deeper soil horizons.

333 We used our RLD data to estimate the total length of the root system of SL28 and  
334 LCICMB1 per plot surface ( $\text{m} \cdot \text{m}^2$ ) between the soil surface and the root front. Drought stress  
335 had contrasted impact on total root length per  $\text{m}^2$  in both lines. We observed a strong and  
336 significant increase in total root system length in LCICMB1 and a non-significant reduction  
337 in total root length in SL28 (Fig 9A). In the water stress treatment, the ratio between total root  
338 length ( $\text{m} \cdot \text{m}^{-2}$ ) and shoot biomass ( $\text{g} \cdot \text{m}^2$ ) increased in both lines indicating a stronger resource  
339 allocation to root growth (Fig 9B). However, this increase was limited and non significant in  
340 SL28 while it was large ( $> 4$  times) and significant in LCICMB1 (Fig 9B). Hence, upon  
341 drought stress both pearl millet lines seem to reallocate resources to root growth but this  
342 reallocation was stronger in LCICMB1.

## 343 **Discussion**

344 Here, in order to study pearl millet root system in field conditions, we developed a model  
345 to evaluate root length density (total length of roots per unit of soil volume; RLD) from root  
346 intersection densities (i.e., the number of root impacts on a vertical soil surface; RID). During  
347 the development of the model, we observed that pearl millet root growth orientation was  
348 dependent on soil depth as already observed for other *Poaceae* species [10, 11]. The  
349 dependence was particularly important for thick roots ( $>1\text{mm}$  diameter) that should  
350 correspond either to the seminal or crown roots [13]. The growth of these roots was more or  
351 less horizontal in shallow soils and became more and more vertical with increased depth.  
352 Conversely, the growth orientation of fine roots, which most likely corresponded to the  
353 different types of laterals [13 and 26], was only marginally dependent on soil depth. This led

354 us to develop a model for RLD estimation that considered soil depth as an important variable.  
355 This model was validated as the most efficient model to infer RLD from RID. Racine 2.1 [25]  
356 was used to manage root data, to calculate RLD and to generate 2D maps of RLD along a soil  
357 profile from simple root intersection counts on a vertical plane (trench) thus providing  
358 agronomically meaningful information to estimate the efficiency of a root system to acquire  
359 water or nutrients in different soil horizons. Like most field root phenotyping methods, this  
360 method is not high throughput but allows easy and low-cost analysis of root system response  
361 to management practices or environmental factors on a reduced sample of accessions. Our  
362 results (RLDs and total root length) are consistent with published data obtained in pearl millet  
363 using the very labor-intensive but exhaustive monolith method where the root system of a  
364 plant is completely dug up by soil layer [27].

365 As calibrated here, our model will not be suitable for all areas where pearl millet is grown,  
366 and in particular to sites with very different soil composition and organization. However, it  
367 was developed on a Dior-type of deep sandy soil that is representative of soils where pearl  
368 millet is grown in Sahelian West Africa and validated in different fields to ensure it was  
369 robust enough. For very different soil types, our model could be simply re-calibrated by  
370 measuring the relation between RLD and RID at different soil depth.

371 Drought is one of the main factors limiting pearl millet yield and drought episodes are  
372 predicted to increase in number and length in the future in West Africa [6, 28]. Previous  
373 studies suggested that pearl millet tolerance to dry environments could be due to mechanisms  
374 regulating water use efficiency and limiting water loss rather than to improved water  
375 acquisition [29]. Interestingly, an expansion of gene families involved in cutin, suberin and  
376 wax biosynthesis was observed in pearl millet compared to other cereals and a potential QTL  
377 for biomass production under drought was found to co-locate with a gene encoding 3-  
378 ketoacyl-CoA synthase that catalyzes the elongation of C24 fatty acids during both wax and

379 suberin biosynthesis [14] thus supporting the link between transpiration barriers and drought  
380 resistance in pearl millet. Experiments using lysimeters indicated that temporal patterns of  
381 water use, rather than total water uptake, were essential for explaining the terminal drought  
382 tolerance of pearl millet genotypes containing a terminal drought tolerance QTL [30].  
383 Therefore, this terminal drought QTL did not affect the water extraction capacity of the root  
384 system. Moreover, it was reported that water stress did not lead to increased water uptake  
385 from deep soil suggesting that drought did not lead to a deeper root system [29]. However, the  
386 corresponding experiments were performed in pots or lysimeters that limit the full expression  
387 of root architecture component compared to field conditions.

388 We therefore used our phenotyping method to analyze the response of pearl millet root  
389 system to water stress during the vegetative phase in field conditions. Our experiments were  
390 performed during the dry season on two germplasms with contrasted characteristics: a dual-  
391 purpose variety that develops a large aerial biomass and is sensitive to drought and an inbred  
392 line with a more limited biomass and that is less sensitive to drought. Our results clearly show  
393 that water stress leads to a reallocation of carbon for root growth combined to a reduction of  
394 RLD in topsoil layers and to an increase in root system depth. It demonstrates that upon  
395 drought stress, pearl millet increases its root growth in deeper soil layer that retain some  
396 water. While we cannot conclude from such a small sample, we can hypothesize that this  
397 response is adaptive, i.e., that it contributes, with other strategies such as reduction in water  
398 loss and temporal regulation of water uptake, to pearl millet tolerance to drought stress.  
399 Further work will be needed to test this hypothesis.

400 In conclusion, we developed a simple way to evaluate and map pearl millet RLD  
401 distribution in field conditions. This opens the perspective to characterize the impact of a  
402 number of environmental factors and management practices on field-grown pearl millet root  
403 system development.

## 404 **Acknowledgements**

405 This research was supported by the Sustainable Intensification Innovation Lab project (SIIL /  
406 Feed the Future) through the United States Agency for International Development (USAID,  
407 grant 929773554). A. Faye was supported by a PhD grant from the SIIL. We thank V. Vadez  
408 (IRD, France) and M.J. Bennett (University of Nottingham, UK) for critical reading of our  
409 manuscript.

## 410 **References**

- 411 1. Burgarella C, Cubry P, Kane NA, Varshney RK, Mariac C, Liu X, et al. A western  
412 Sahara centre of domestication inferred from pearl millet genomes. *Nature Ecology &*  
413 *Evolution*. 2018 Sep; 2(9):1377–80.
- 414 2. Yadav OP, Singh DV, Vadez V, Gupta SK, Rajpurohit BS, Shekhawat PS. Improving  
415 pearl millet for drought tolerance – Retrospect and prospects. *Indian Journal of*  
416 *Genetics and Plant Breeding (The)*. 2017;77(4):464.
- 417 3. Anuradha N, Satyavathi CT, Bharadwaj C, Sankar M, Pathy L. Association of  
418 agronomic traits and micronutrients in pearl millet. *International Journal of Chemical*  
419 *Studies*. 2018-6(1):181-184
- 420 4. Varshney RK, Shi C, Thudi M, Mariac C, Wallace J, Qi P, et al. Pearl millet genome  
421 sequence provides a resource to improve agronomic traits in arid environments. *Nature*  
422 *Biotechnology*. 2017 Sep 18;35(10):969–76.
- 423 5. Garg BK, Kathju S, Lahiri AN. Effect of Plant Density and Soil Fertility on Pearl  
424 Millet Under Drought and Good Rainfall Situations. *Annals of Arid Zone* 32(1) 13 -20  
425 1993.

- 426 6. Singh P, Boote KJ, Kadiyala MDM, Nedumaran S, Gupta SK, Srinivas K, et al. An  
427 assessment of yield gains under climate change due to genetic modification of pearl  
428 millet. *Science of the Total Environment*. 2017 Dec 1; 601–602:1226–37.
- 429 7. Barber SA. Effect of Tillage Practice on Corn (*Zea mays* L.) Root Distribution and  
430 Morphology 1. *Agronomy Journal*. 1971 10/01; 63(5):724–6.
- 431 8. Gardner WR. Dynamic aspects of water availability to plants : soil science. 1960
- 432 9. Gardner WR. Relation of Root Distribution to Water Uptake and Availability 1.  
433 *Agronomy Journal*. 1964 2/01;56(1):41–5.
- 434 10. Chopart JL, Siband P. Development and validation of a model to describe root length  
435 density of maize from root counts on soil profiles. *Plant and Soil*. 1999 Aug 1;  
436 214(1):61–74.
- 437 11. Chopart J-L, Rodrigues SR, Carvalho de Azevedo M, de Conti Medina C. Estimating  
438 sugarcane root length density through root mapping and orientation modelling. *Plant  
439 and Soil*. 2008a Dec; 313(1–2):101–12.
- 440 12. Chopart J-L, Sine B, Dao A, Muller B. Root orientation of four sorghum cultivars:  
441 application to estimate root length density from root counts in soil profiles. *Plant Root*.  
442 2008b; 2:67–75.
- 443 13. Passot S, Gnacko F, Moukouanga D, Lucas M, Guyomarc'h S, Ortega BM, et al.  
444 Characterization of pearl millet root architecture and anatomy reveals three types of  
445 lateral roots. *Front Plant Sci*. 2016. p. 829. Available :  
446 <https://www.frontiersin.org/article/10.3389/fpls.2016.00829> 14.
- 447 14. Debieu M, Sine B, Passot S, Grondin A, Akata E, Gangashetty P, et al. Response to  
448 early drought stress and identification of QTLs controlling biomass production under  
449 drought in pearl millet. *PLOS ONE*. 2018 Oct 25; 13 (10):e0201635.

- 450 15. Chopart JL, Vauclin M. Water Balance Estimation Model: Field Test and Sensitivity  
451 Analysis. *Soil Science Society of America Journal*. 1990 10/01;54(5):1377–84
- 452 16. Tennant D. A Test of a Modified Line Intersect Method of Estimating Root Length.  
453 *Journal of Ecology*. 1975;63(3):995–1001.
- 454 17. Dusserre J, Audebert A, Radanielson A, Chopart J-L. Towards a simple generic model  
455 for upland rice root length density estimation from root intersections on soil profile.  
456 *Plant Soil*. 2009 Apr 8; 325(1):277.
- 457 18. Lang ARG, Melhuish FM. Lengths and Diameters of Plant Roots in Non-Random  
458 Populations by Analysis of Plane Surfaces. *Biometrics*. 1970 Sep; 26 (3):421.
- 459 19. Van Noordwijk M., 1987. Method for quantification of root distribution patterns and  
460 root dynamics in the field. 20th Symposium, International Potash Institute, Bern,  
461 Switzerland, pp. 247-256
- 462 20. Bohm W. 1976 In situ estimation of root length density at natural soil profiles *J. Agric.*  
463 *Camb.* 87, 365-368
- 464 21. Azevedo MCB de, Chopart JL, Medina C de C. Sugarcane root length density and  
465 distribution from root intersection counting on a trench-profile. *Scientia Agricola*. 2011  
466 Feb;68(1):94–101.
- 467 22. Nash JE, Sutcliffe JV. River flow forecasting through conceptual models part I — A  
468 discussion of principles. *Journal of Hydrology*. 1970 Apr 1; 10 (3):282–90.
- 469 23. Loague K, Green RE. Statistical and graphical methods for evaluating solute transport  
470 models: Overview and application. *Journal of Contaminant Hydrology*. 1991 Jan  
471 1;7(1):51–73
- 472 24. Sinclair T, Ludlow M. Influence of Soil Water Supply on the Plant Water Balance of  
473 Four Tropical Grain Legumes. *Functional Plant Biology*. 1986;13(3):329.

- 474 25. Chopart JL, Faye A, Lindemann J, Mézino M, RACINE2.2: Application de gestion de  
475 calculs et de cartographie de données racinaires obtenues à partir de comptages de  
476 racines sur des profils de sol. Version 2.2 Notice d'utilisation (2019) :18.
- 477 26. Passot S, Moreno-Ortega B, Moukouanga D, Balsera C, Guyomarc'h S, Lucas M, et al.  
478 A New Phenotyping Pipeline Reveals Three Types of Lateral Roots and a Random  
479 Branching Pattern in Two Cereals. *Plant Physiology*. 2018 Jul 1;177(3):896–910.
- 480 27. Chopart J. L., 1983. Etude du système racinaire du mil (*Pennisetum typhoides*) dans un  
481 sol sableux du Sénégal. *Agron. Trop.*, 18(1): 37-46.
- 482 28. Ben Mohamed A, van Duivenbooden N, Abdoussallam S. Impact of Climate Change  
483 on Agricultural Production in the Sahel – Part 1. Methodological Approach and Case  
484 Study for Millet in Niger. *Climatic Change*. 2002 Aug 1;54(3):327–48.
- 485 29. Zegada-Lizarazu W, Iijima M. Deep Root Water Uptake Ability and Water Use  
486 Efficiency of Pearl Millet in Comparison to Other Millet Species. *Plant Production  
487 Science*. 2005 Jan 1;8(4):454–60.
- 488 30. Vadez V, Kholová J, Yadav RS, Hash CT. Small temporal differences in water uptake  
489 among varieties of pearl millet (*Pennisetum glaucum* (L.) R. Br.) are critical for grain  
490 yield under terminal drought. *Plant and Soil*. 2013 Oct;371(1–2):447–62.

491

492

## 493 **Figure legends**

494 **Fig 1. Root intersections density (RID) counting method used for root length density**  
495 **(RLD) modeling from RID.** (A) Experimental design and trench profile for root sampling (at  
496 30 cm from the plant in this example), (B) and (C) sampling device with sides oriented  
497 according to the soil surface and plant row (H: horizontal, L: longitudinal, T: transversal), (D)  
498 and (E) root sampling process, (F) Root impacts counting on all three sides of soil cubes  
499 extracted from the trench profile, and (G) grid (5x 5 cm mesh) on a soil profile for soil-roots  
500 intersections counting (RI).

501 **Fig 2. Characteristics of the varieties used for model calibration.** (A) Root length density,  
502 (B) root biomass density and (C) shoot biomass. Data are mean +/- standard deviation.  
503 Significant differences (Tukey's HSD) are indicated by different letters. For root traits, the  
504 mean of the two observation dates (60 DAP and 80 DAP) was considered.

505 **Fig 3. Fine and thick root growth orientation.** Relationship between the number of  
506 measured root impacts on a vertical face and measured root length density.

507 **Fig 4. Elaboration of geometric models (all, thick and fine roots).** Relationship between  
508 soil depth measurements (meters) and the main direction of root growth in relation to a  
509 vertical plane (Pv index).

510 **Fig 5. Test of the relationship between measured and calculated RLD for the four**  
511 **proposed models.** (A) Empirical model with all varieties bulked, (B) geometric model with  
512 all roots, (C) geometric models for fine roots (diameter<1 mm) and (D) thick roots (diameter  
513 >1 mm).



514 **Fig 6. Agromorphological characteristics of SL28 and LCICMB1.** (A) aerial biomass  
515 ( $\text{g.m}^{-2}$ ), and (B) the Total grain weight ( $\text{g.m}^{-2}$ ) measured at the end of cycle for WW and DS  
516 conditions.

517 **Fig 7. Impact of water deficit on root length density distribution according to depth in**  
518 **SL28 and LCICMB1.** SL28 at 43 DAP (A), and 71 DAP (C), LCICMB1 at 44 DAP (B), and  
519 72 DAP (D). Mean of RLD of four plants per variety was considered for each variety.

520 **Fig 8. Impact of water deficit on mean root distribution for SL28 and LCICMB1 in the**  
521 **soil profile.** Data mapped on a  $0.05 \times 0.05$  m grid like in the field and expressed in root  
522 length density (RLD) in WW and DS conditions for SL28 in (A) and the inbred line  
523 LCICMB1 in (B).

524 **Fig 9. Impact of water deficit on total root length of SL28 and LCICMB1.** (A) Total root  
525 length ( $\text{m.m}^{-3}$ ) measured at 72 DAP at the end of water stress treatment, and (B) ratio between  
526 total root length ( $\text{m.m}^{-3}$ ) and aerial biomass.

527

528 **Supporting information**

529 **S1 Fig. Climatic data for Exp. 1 & 2**

530 **S2 Fig. Climatic data for Exp. 3**

531 **S3 Fig. Soil water content during Exp. 3**

532 **S1 Table. Student t-test on the effect of different factors on the preferential orientation**

533 **indices (P) of fine ( $P_f$ ), thick ( $P_t$ ) and all roots ( $P_a$ )**

534 **Supporting Data. Data from all the experiments.**

535



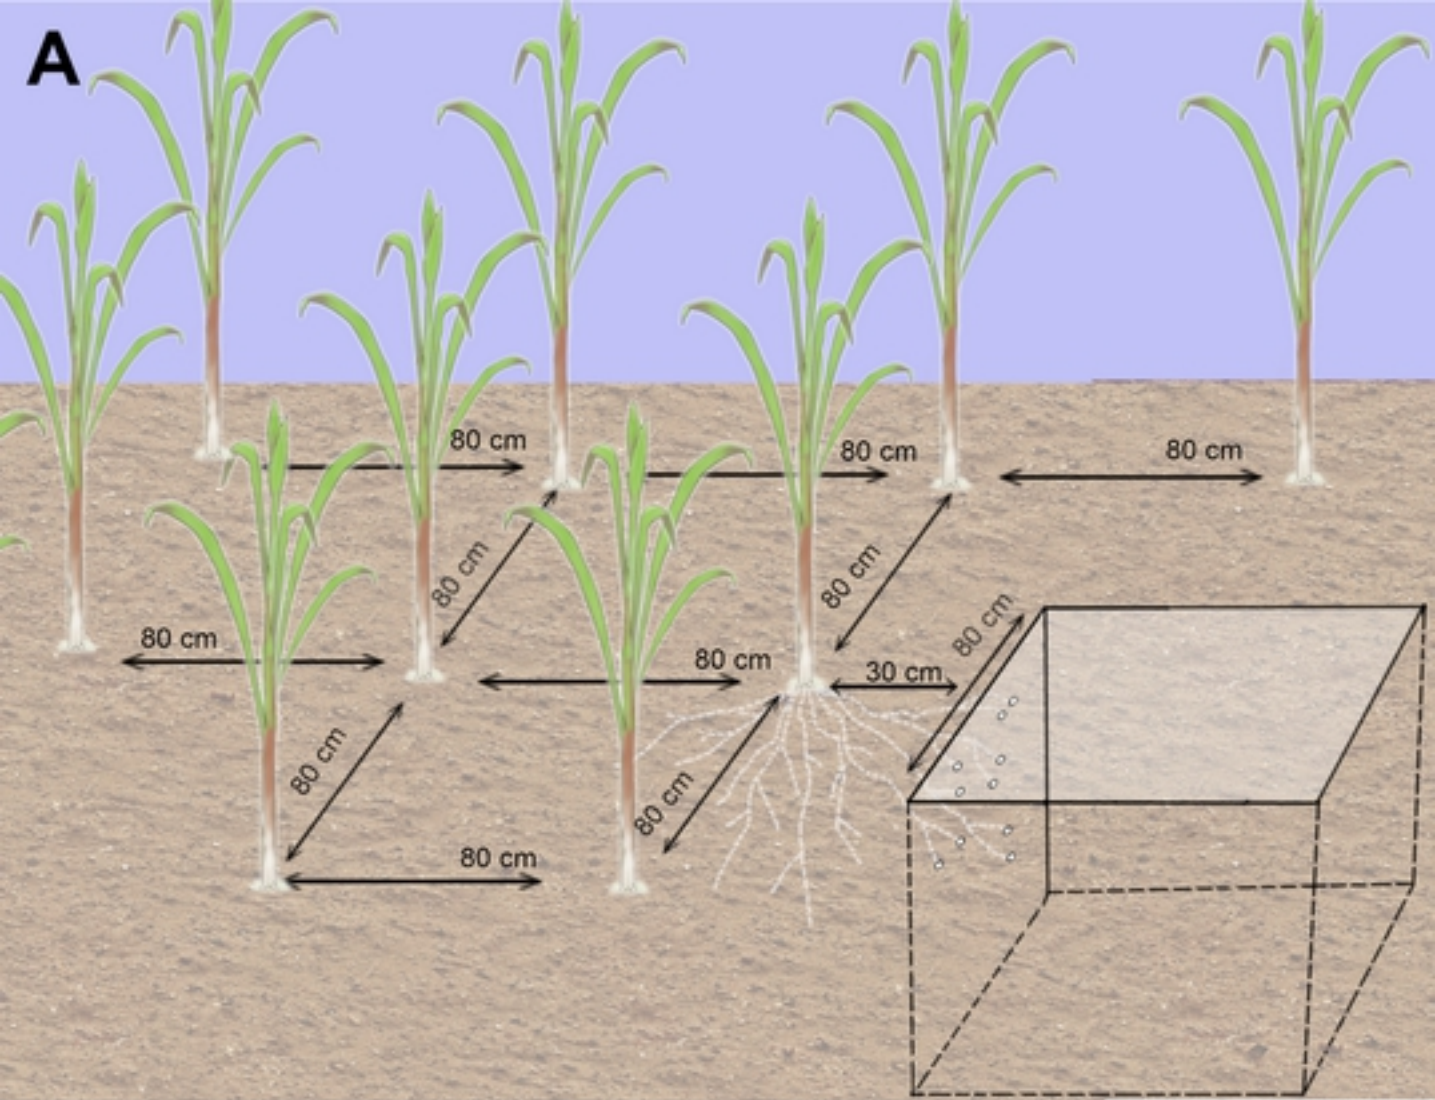

bioRxiv preprint doi: <https://doi.org/10.1101/574285>; this version posted March 11, 2019. The copyright holder for this preprint (which was not certified by peer review) is the author/funder, who has granted bioRxiv a license to display the preprint in perpetuity. It is made available under aCC-BY 4.0 International license.

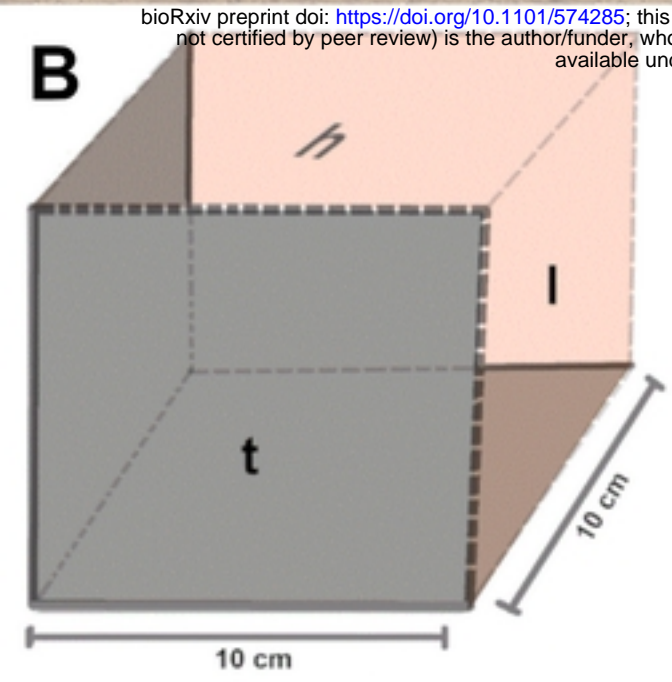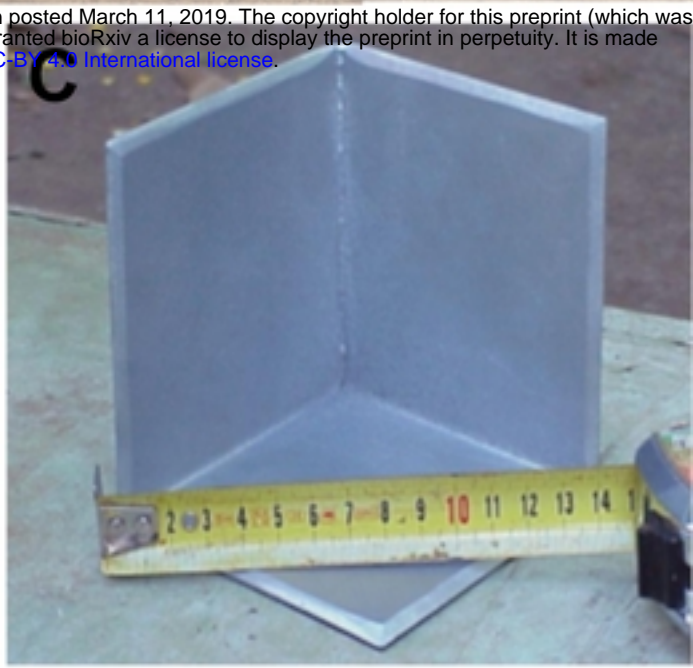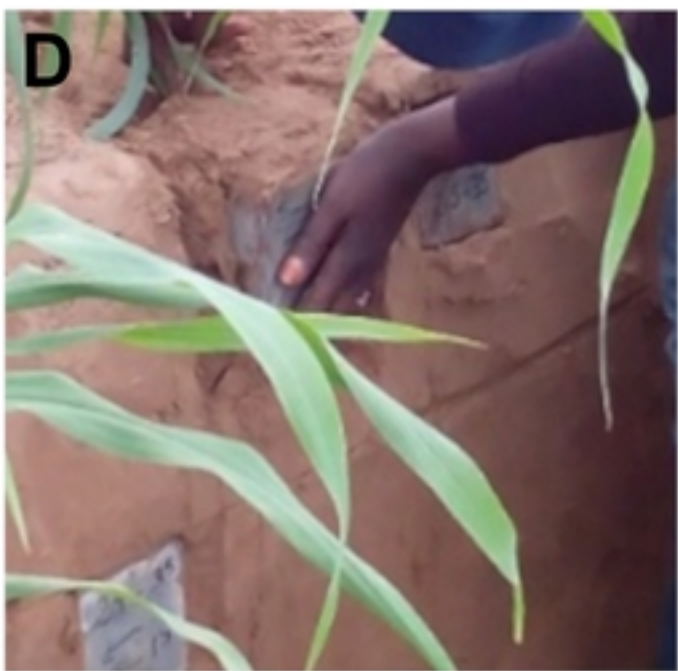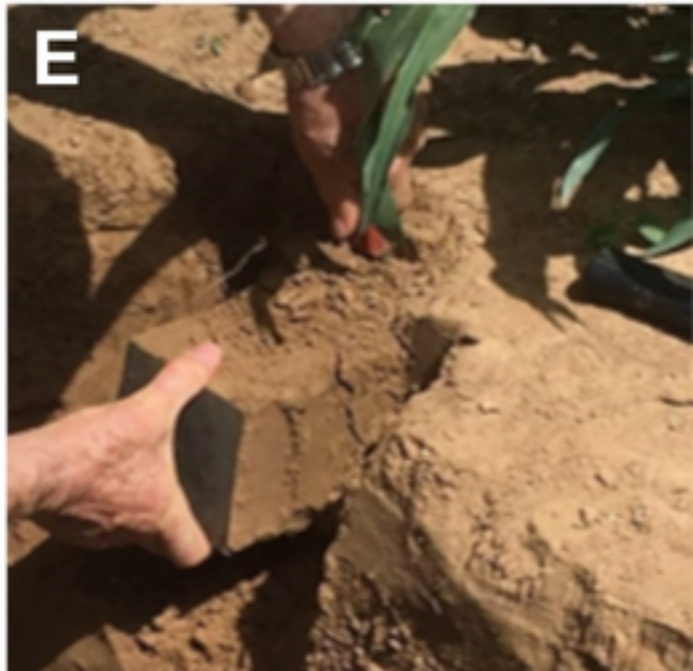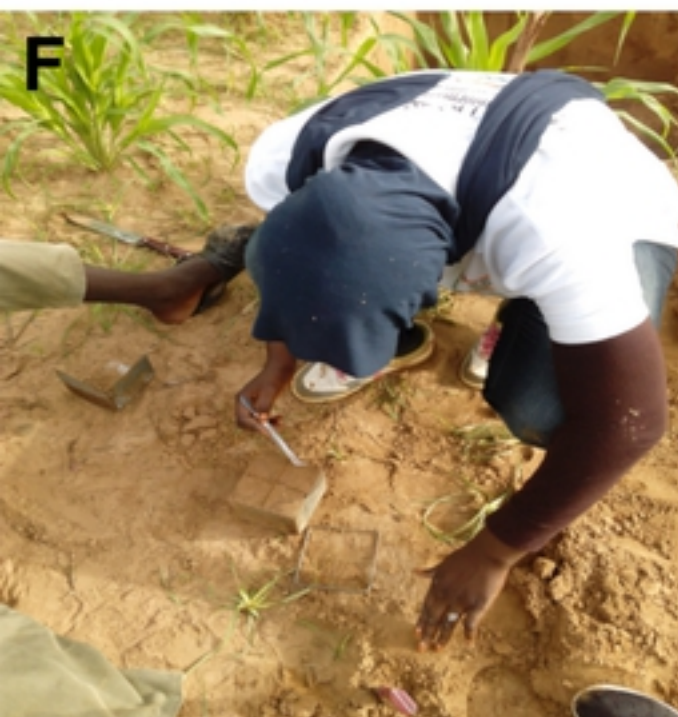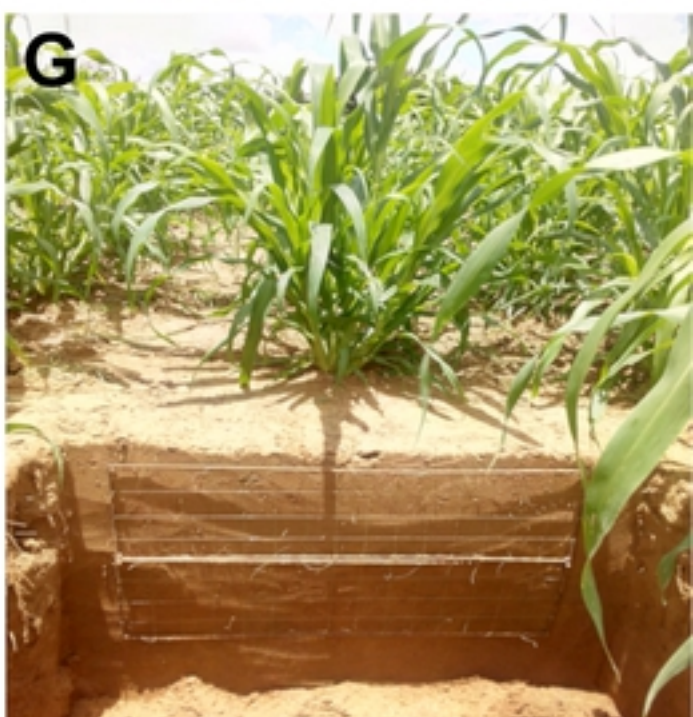

Figure 1



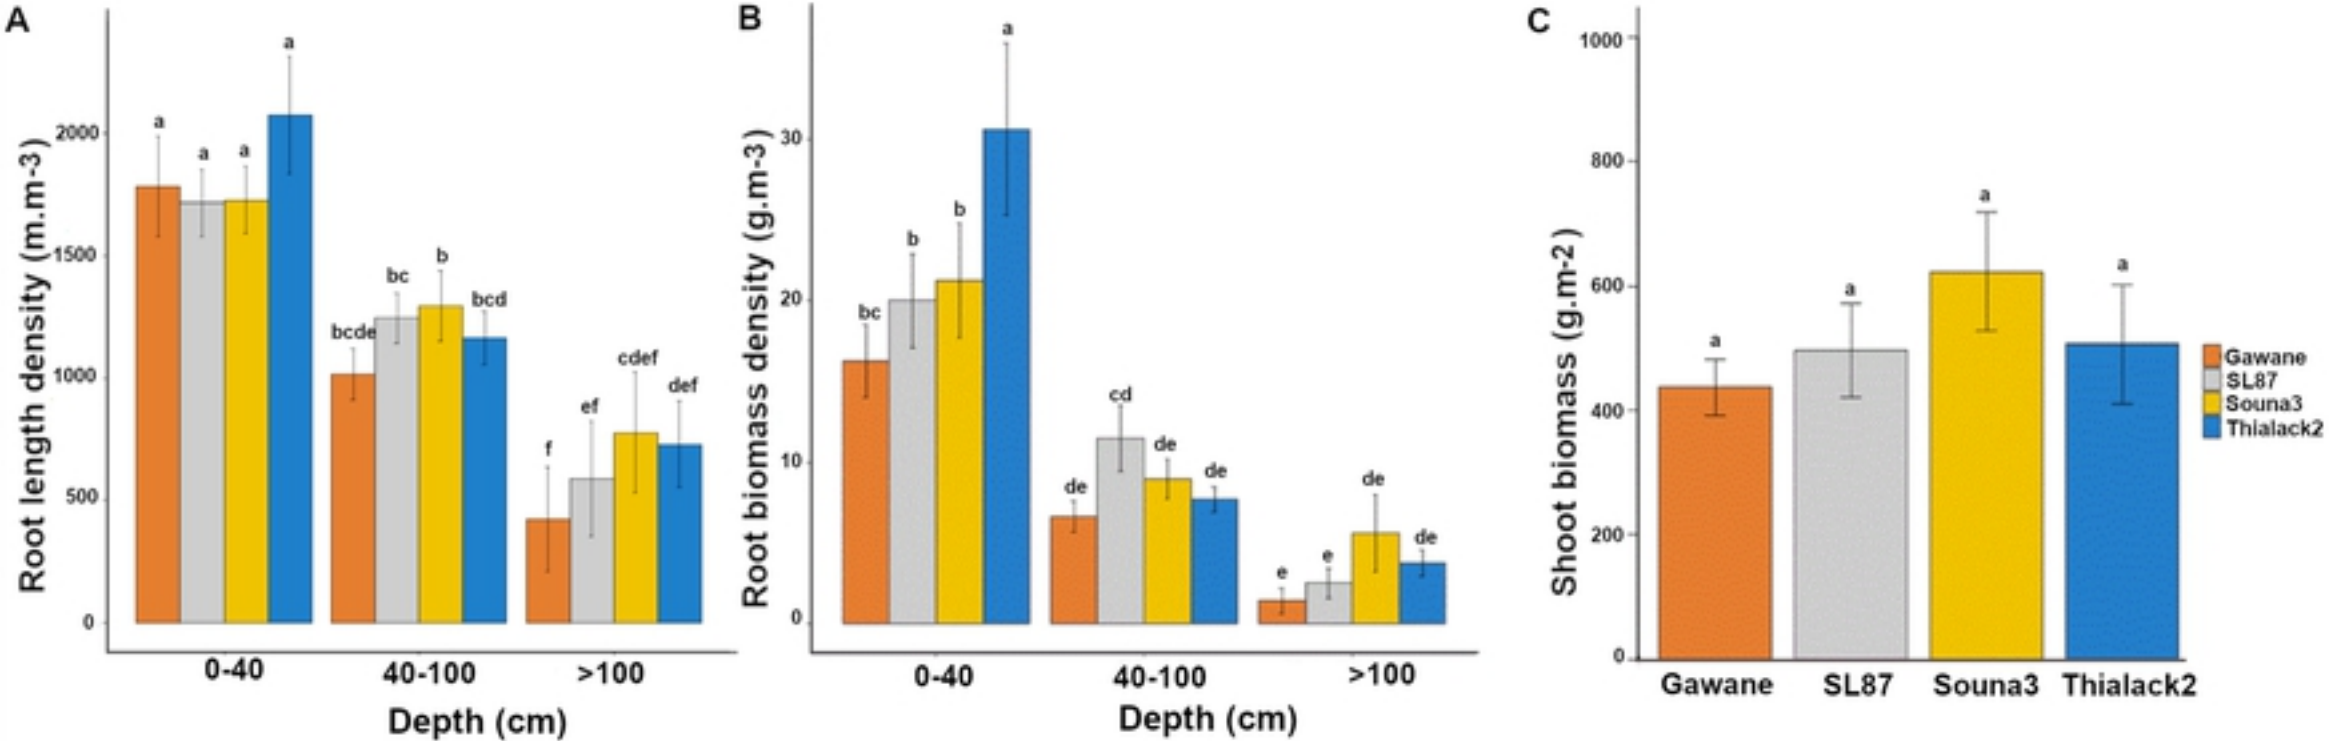

Figure 2

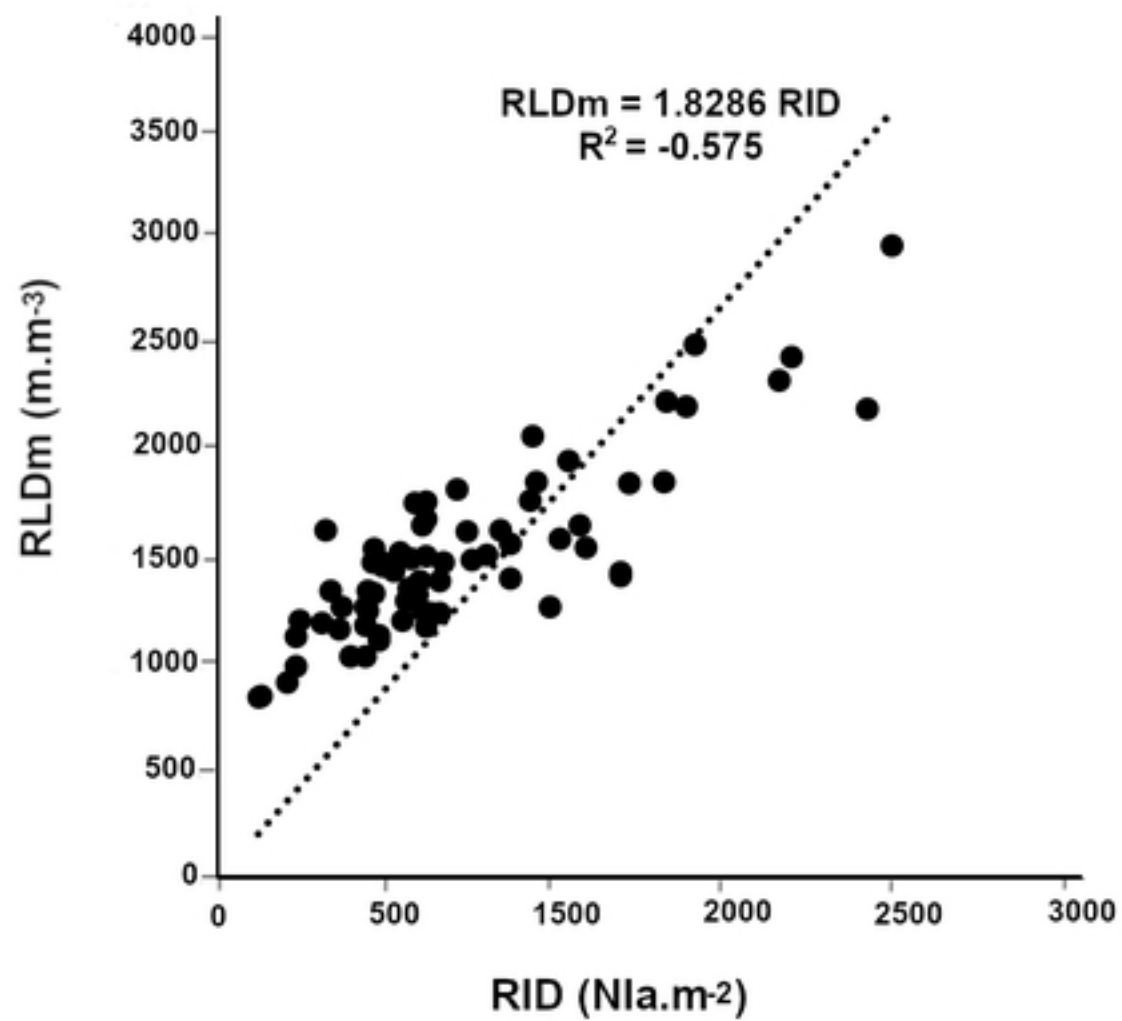

Figure 3

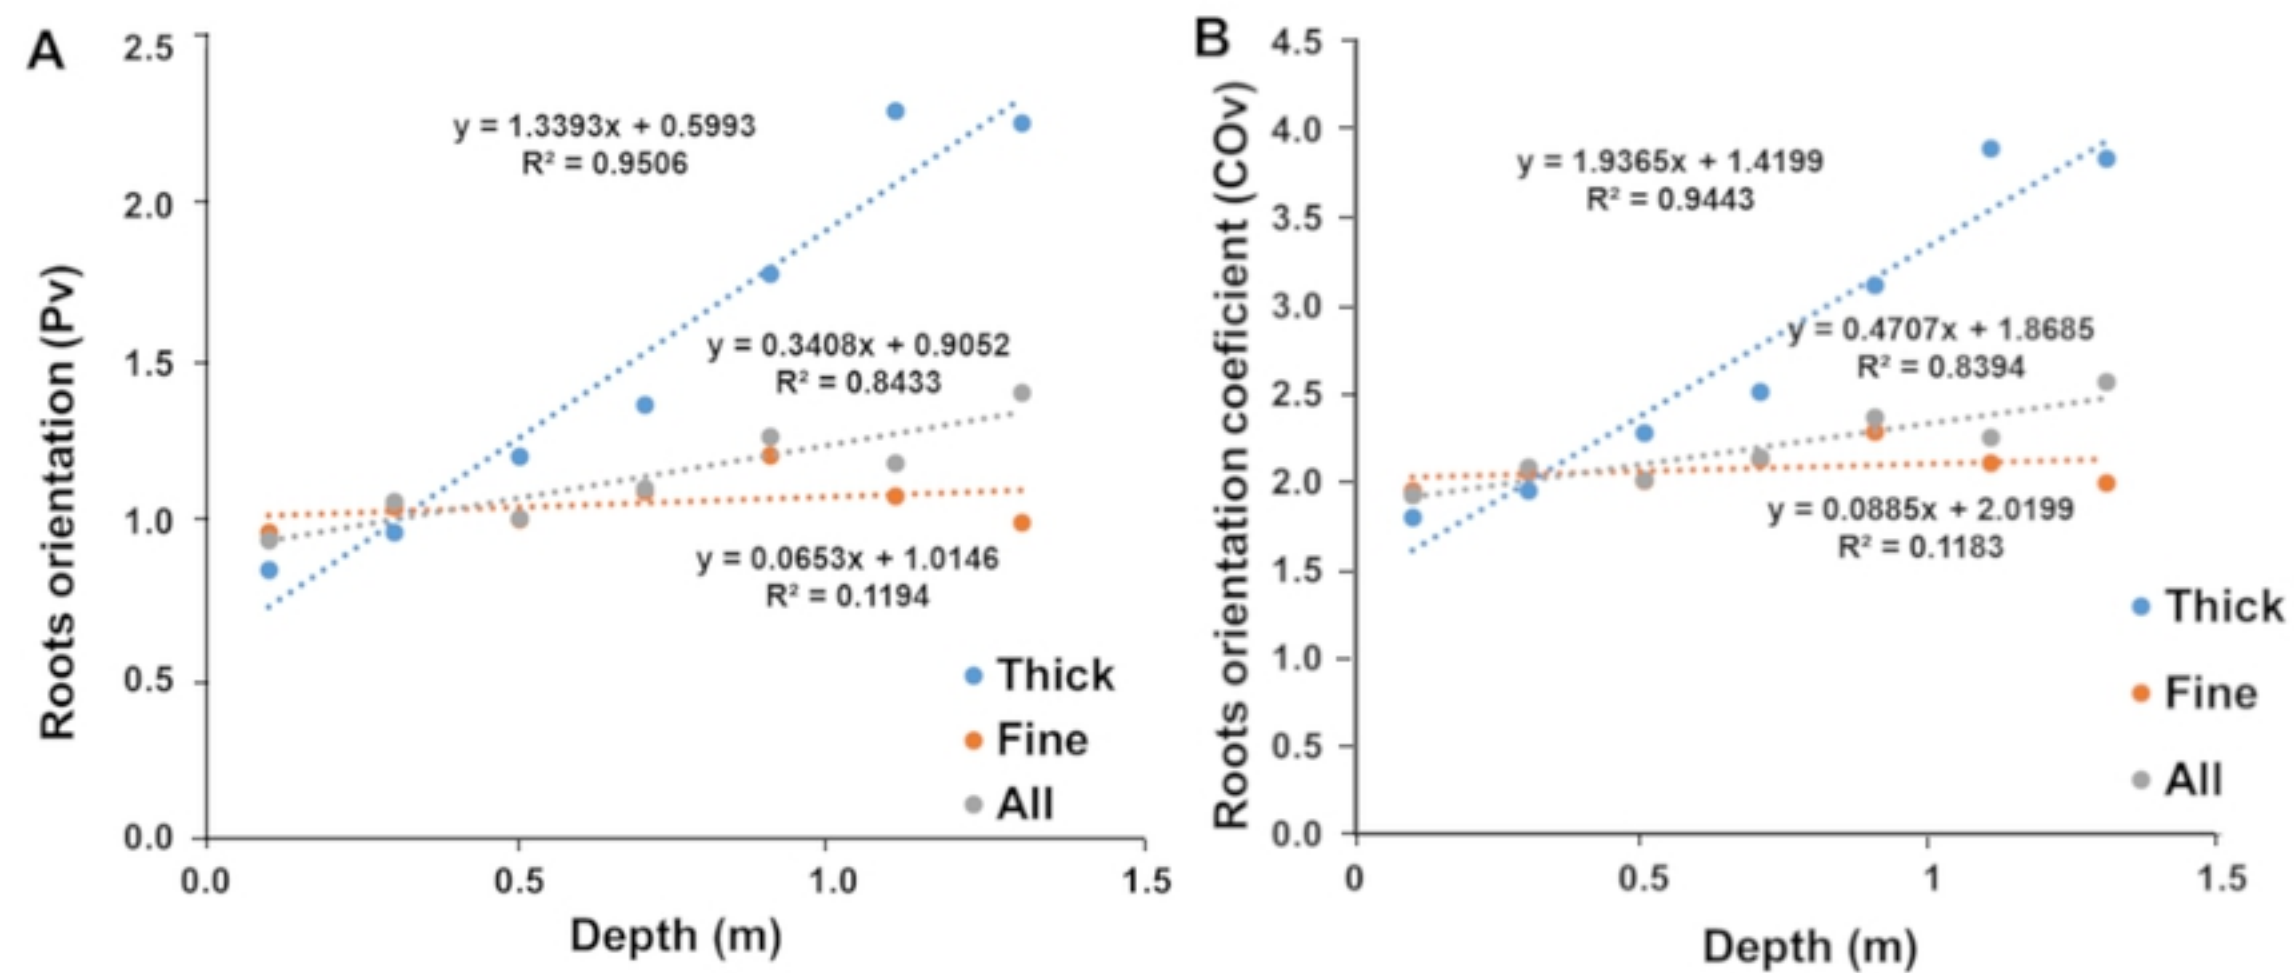

Figure 4

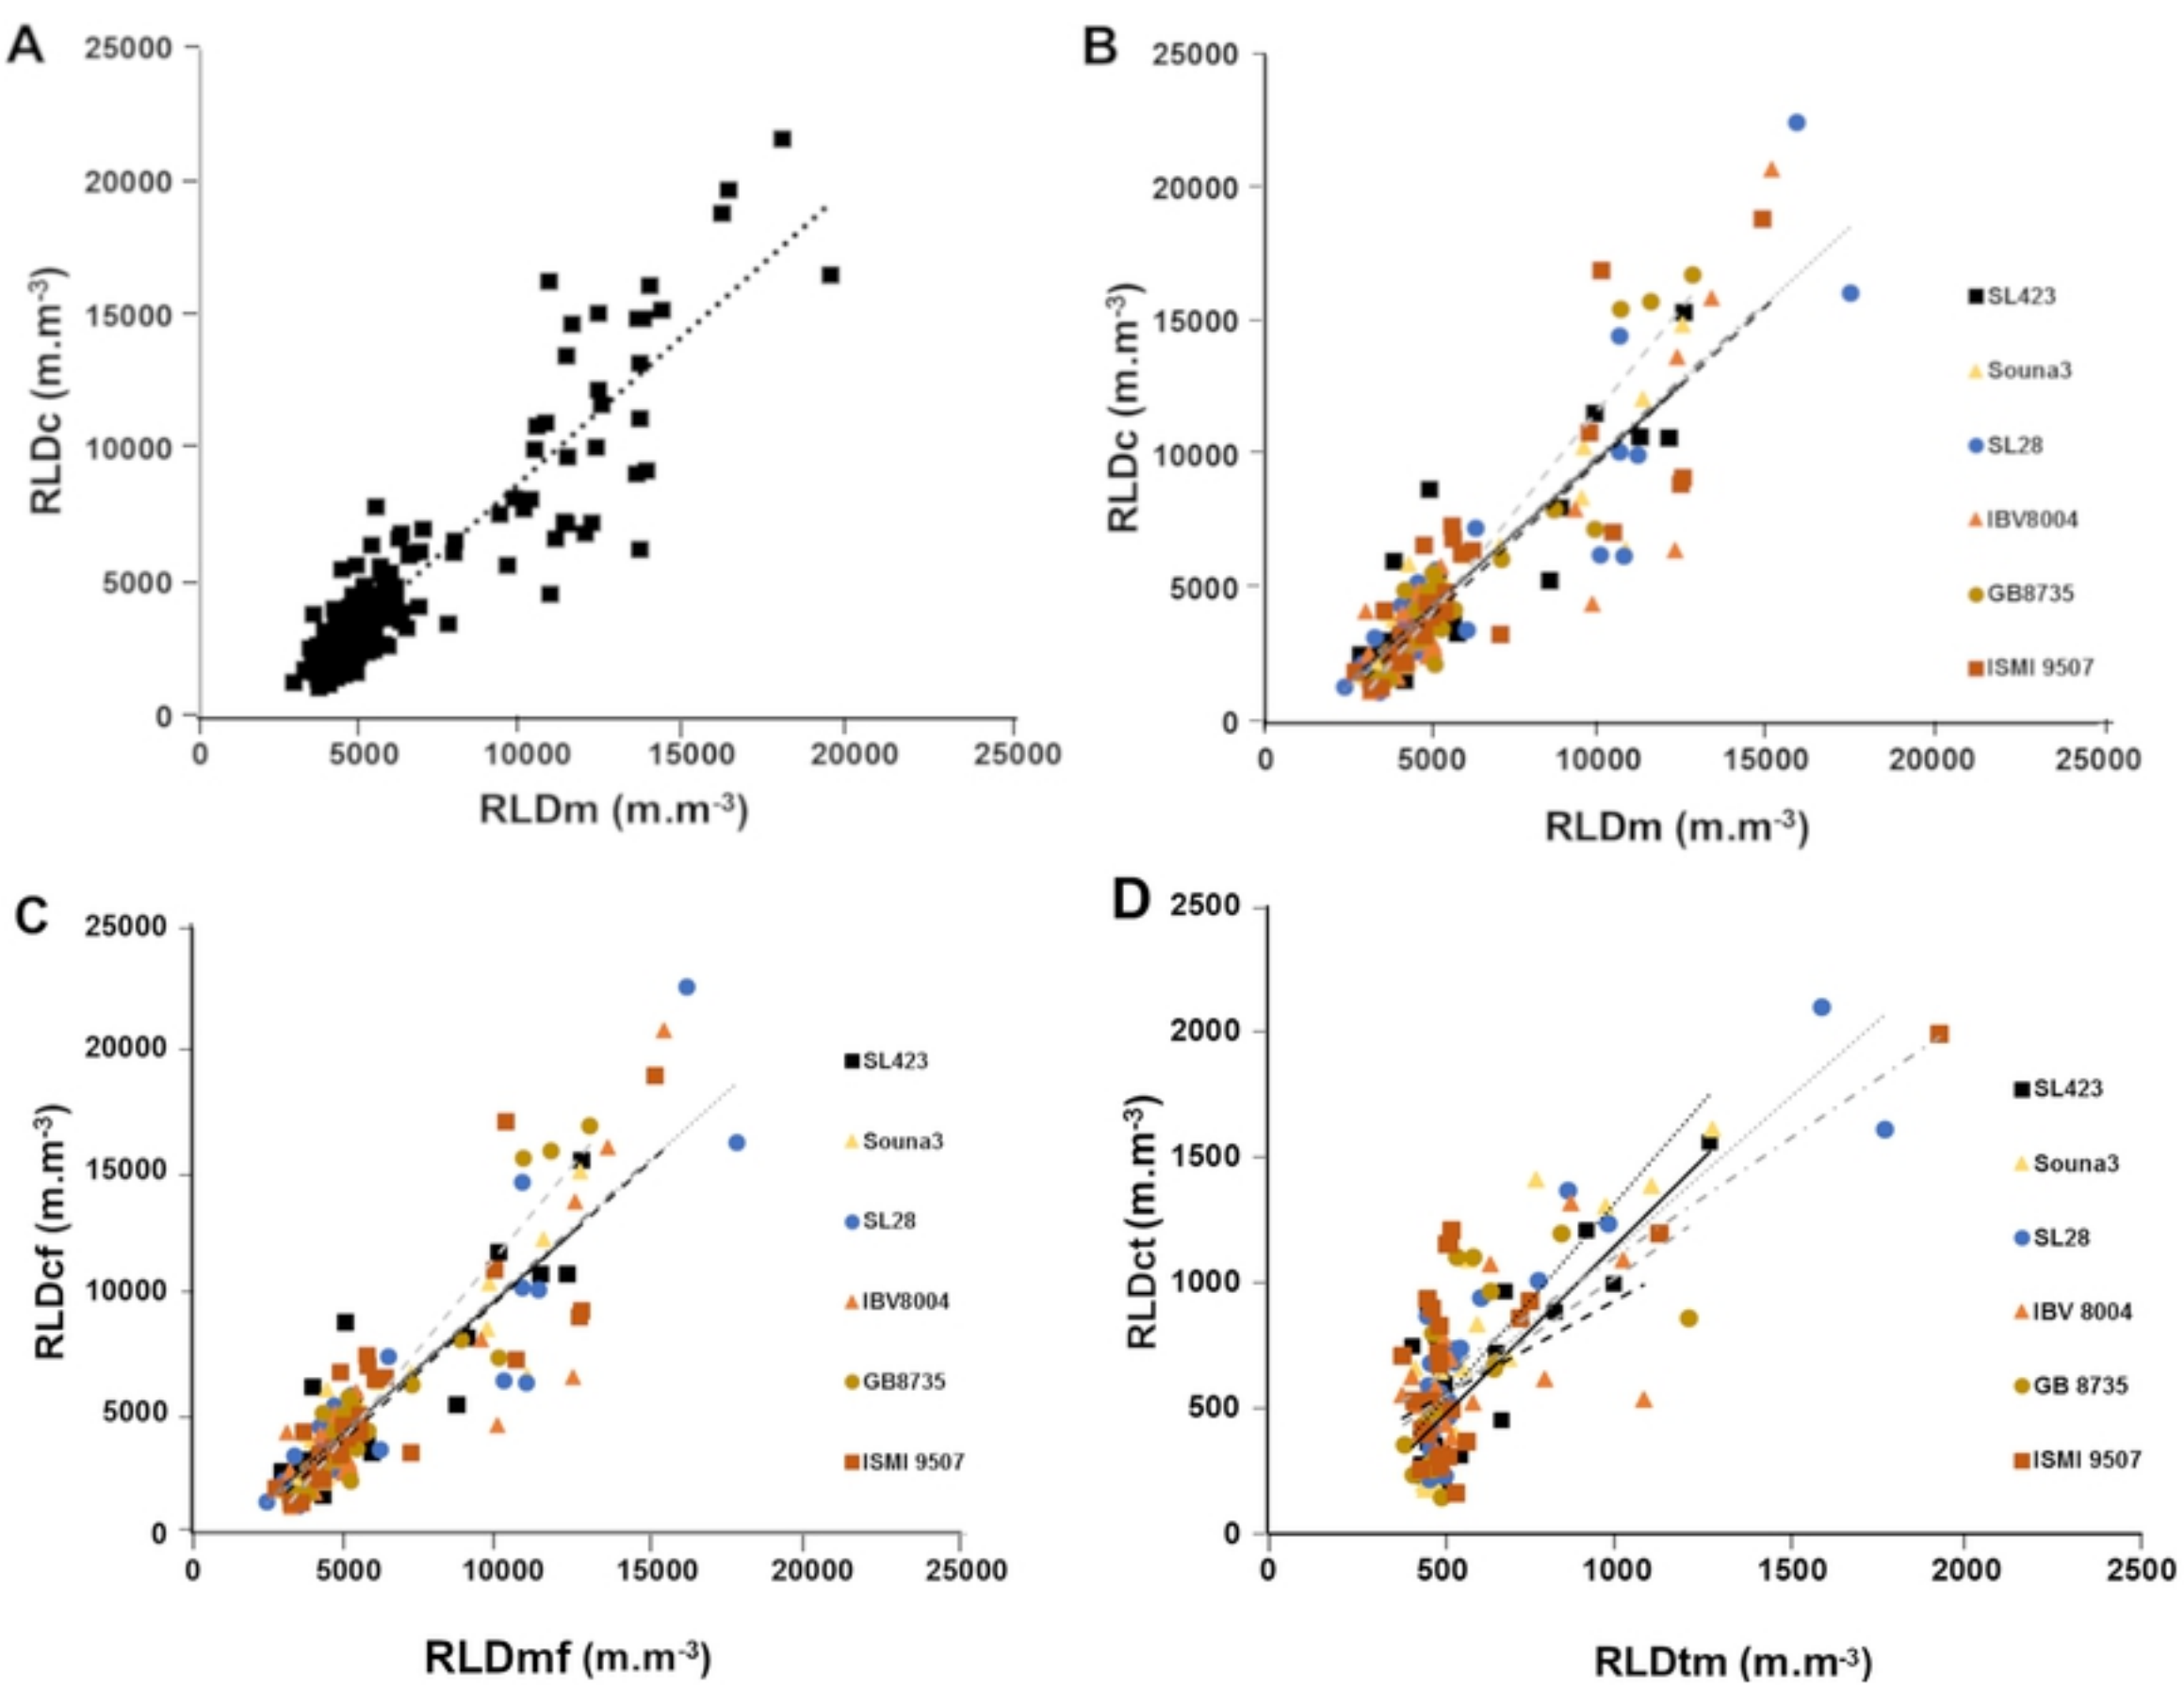

Figure 5

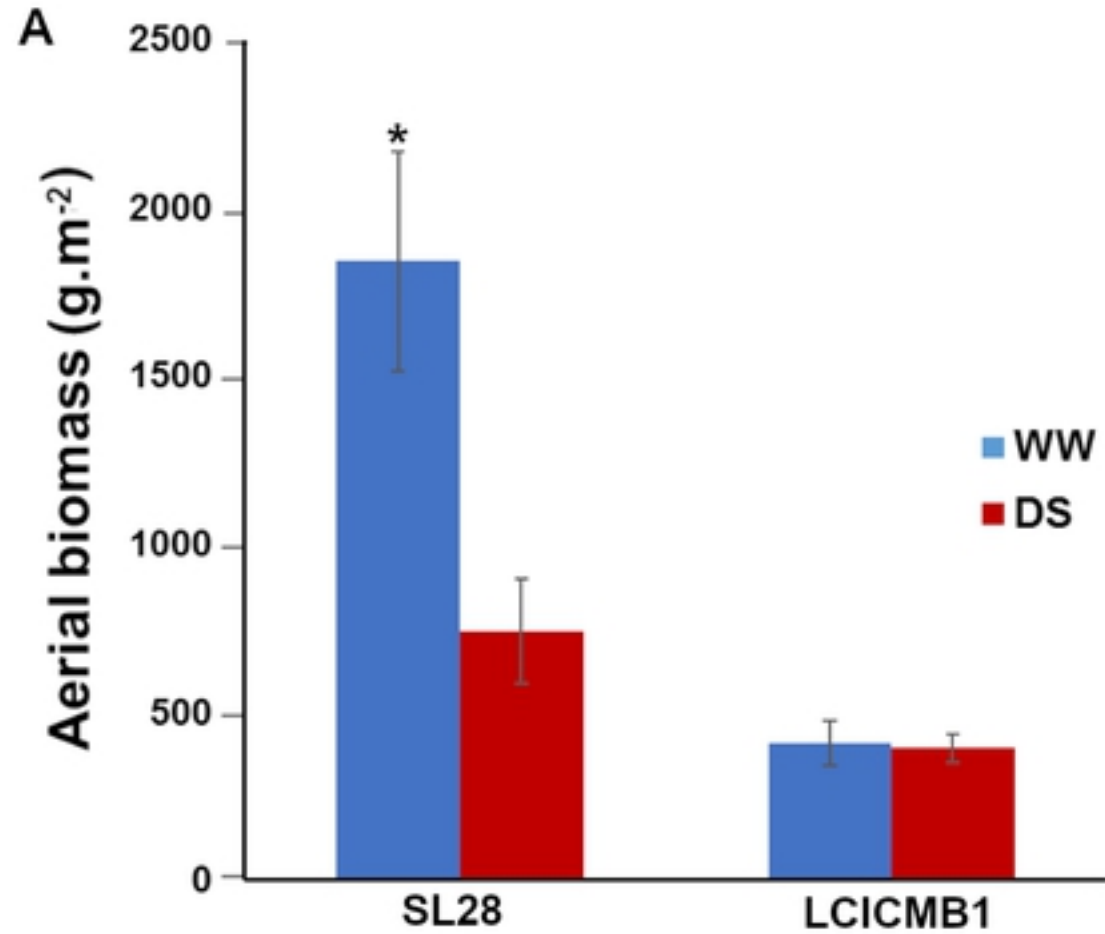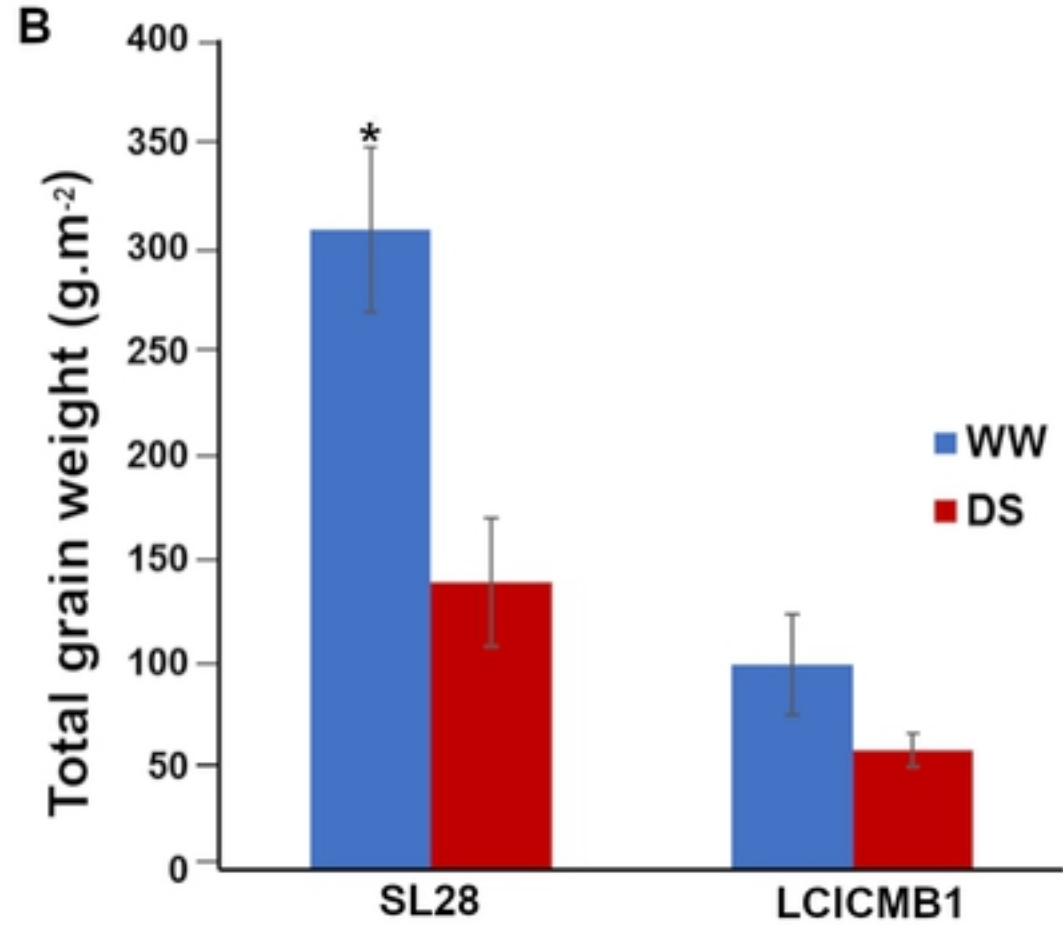

Figure 6



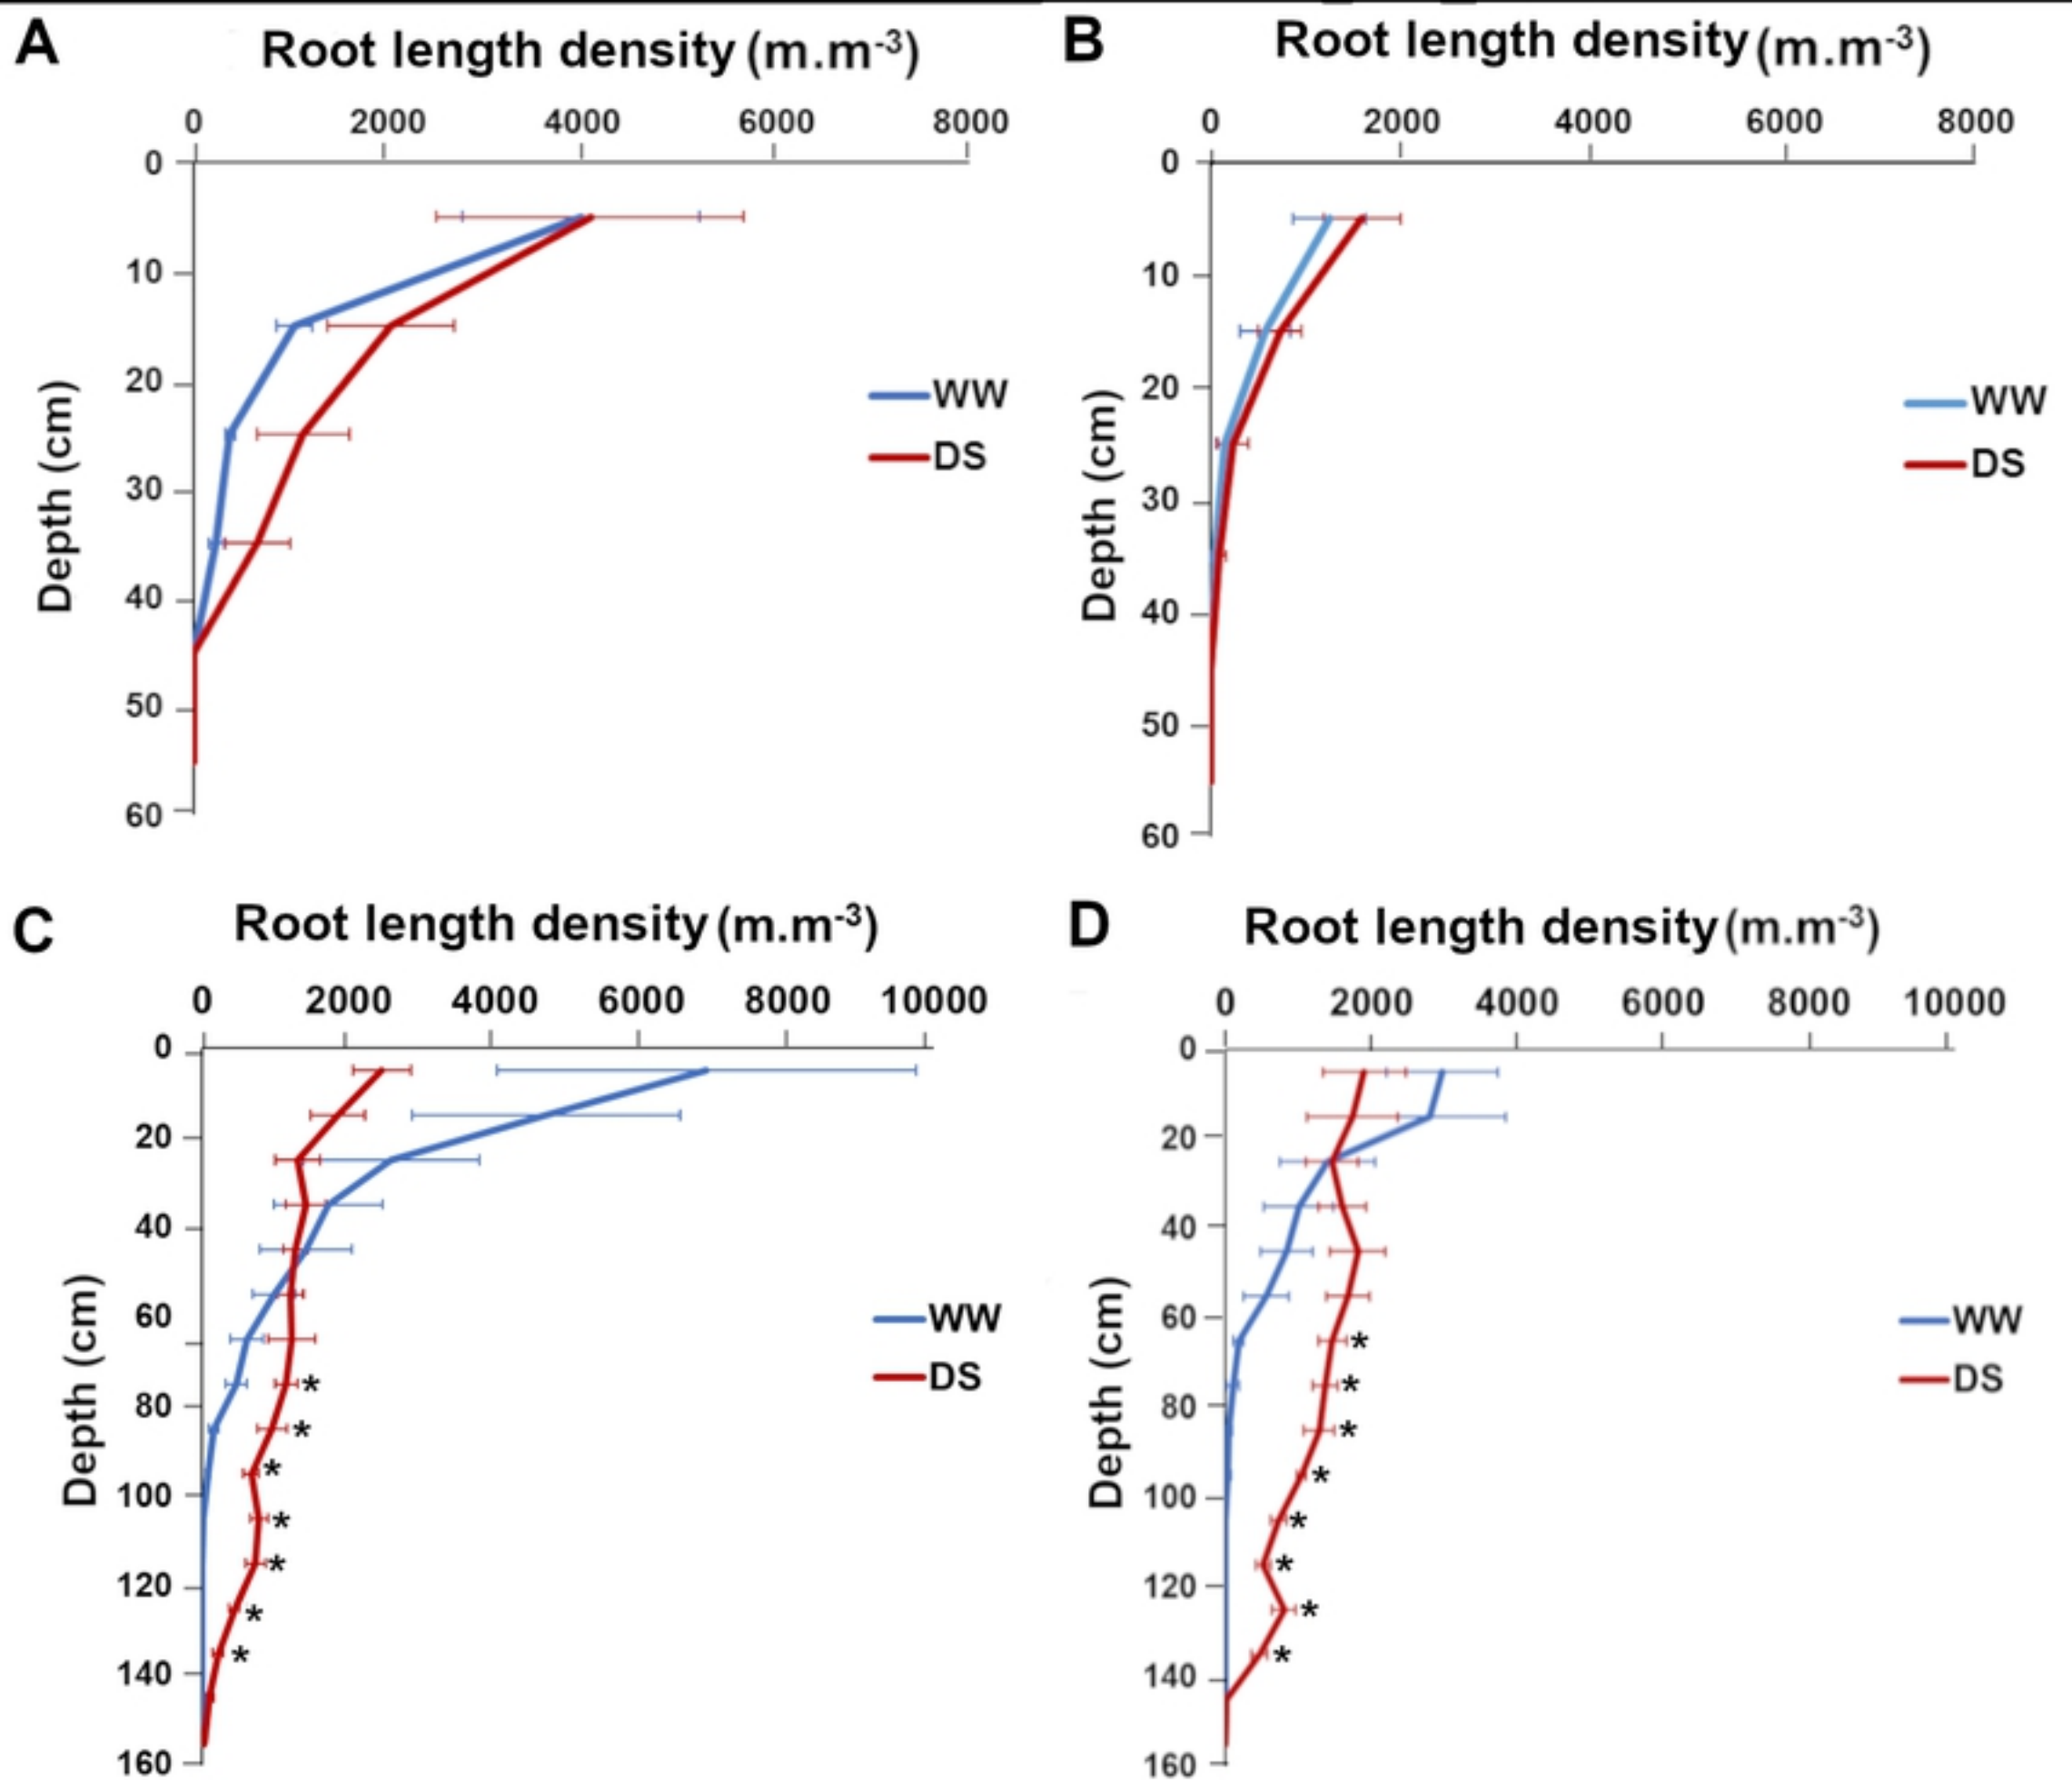

Figure 7



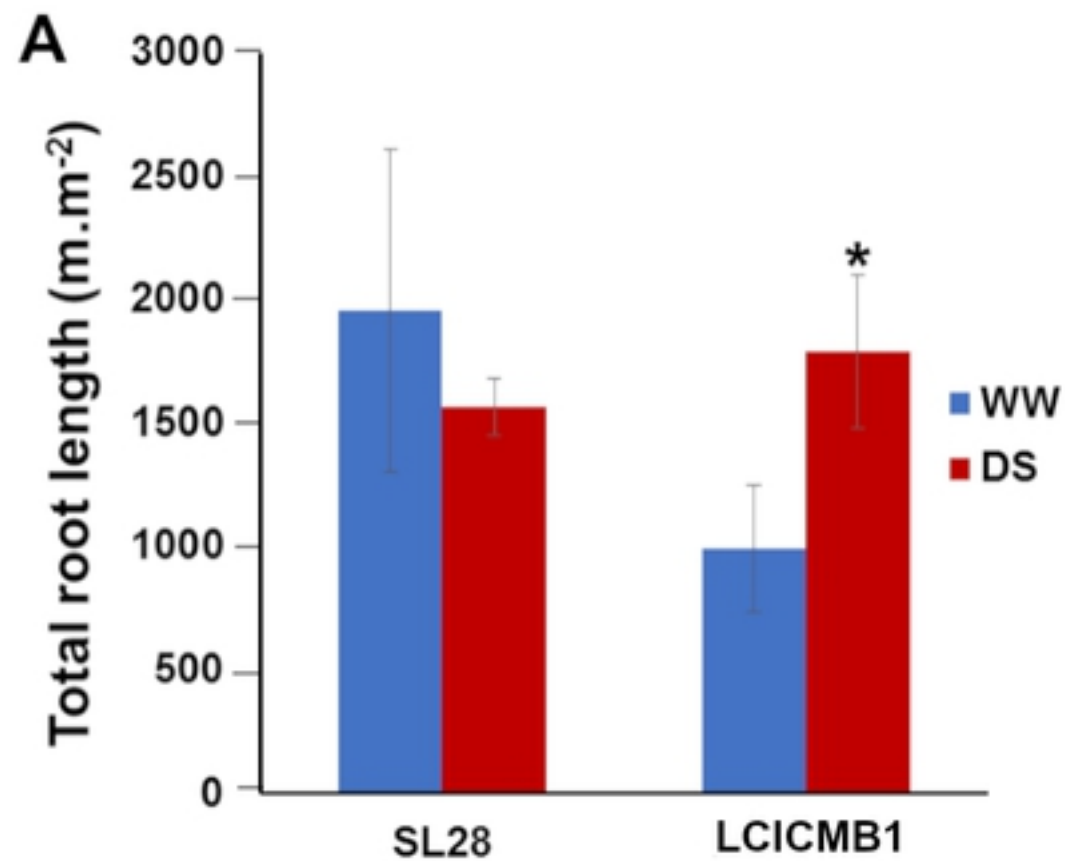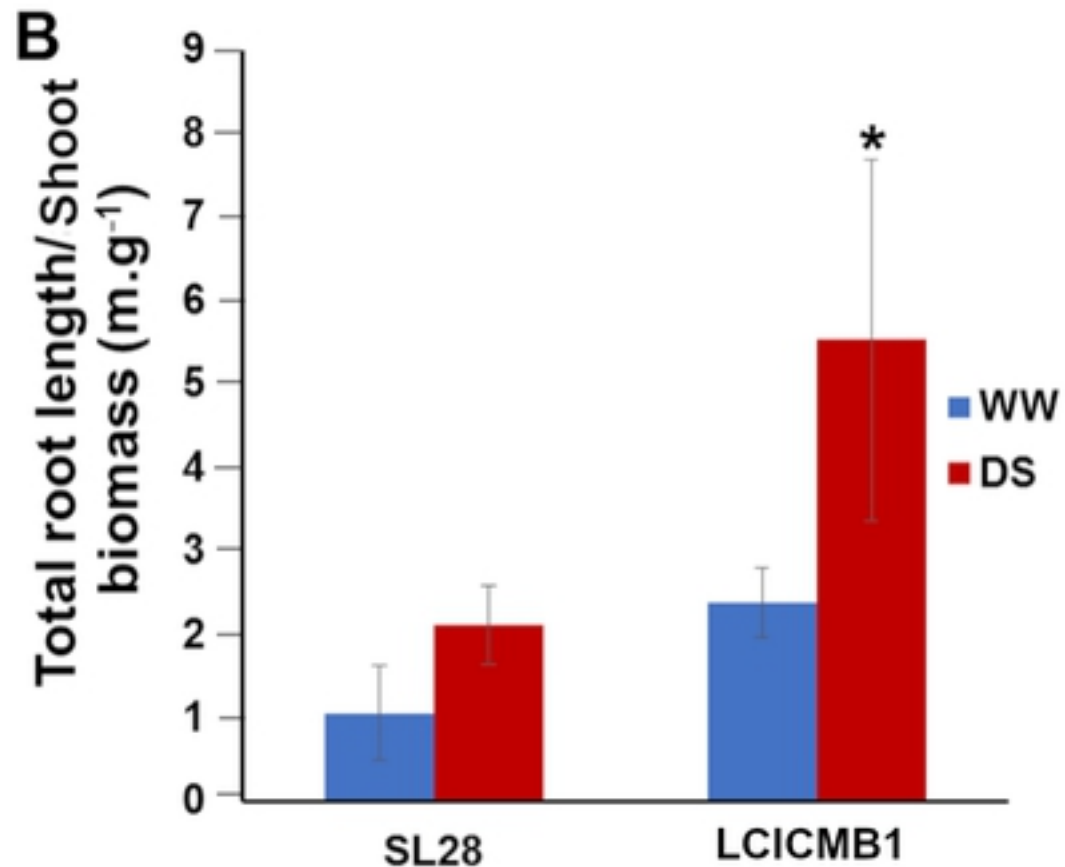

Figure 9
